# Supplementary material for: Merging 2,3-butanedione and N-hydroxysuccinimide as visible-light-enabled hydrogen atom transfer catalysts for CC double bond cleavage of 2-cyanoaryl acrylamides toward the synthesis of 4-amino-2-quinolones
Source: Royal Society of Chemistry journal article supplement (doi:10.1039/d4qo00458b), 2024-01-01

## Supplementary Information

### Merging 2,3-butanedione and N-hydroxysuccinimide as visible-light-enabled hydrogen atom transfer catalysts for C=C double bond cleavage of 2-cyanoaryl acrylamides toward 4-amino-2-quinolones

Jun Huang,<sup>a</sup> Fengting Zhu,<sup>a</sup> Jinlian Wen,<sup>a</sup> Jiali Xu,<sup>a</sup> Jing-Mei Yuan<sup>a,b,\*</sup> and Wenqiang Chen<sup>a,\*</sup>

<sup>a</sup> Guangxi Key Laboratory of Natural Polymer Chemistry and Physics, College of Chemistry and Materials, Nanning Normal University, Nanning, Guangxi 530001, People's Republic of China.

<sup>b</sup> State key Laboratory for the Chemistry and Molecular Engineering of Medicinal Resources, Guangxi Normal University, Guilin, Guangxi 541004, People's Republic of China.

\* Corresponding authors. Email: yuanjm9@nnnu.edu.cn; chenwqAP@163.com

### Contents

|                                                                                                                                     |    |
|-------------------------------------------------------------------------------------------------------------------------------------|----|
| 1. General information .....                                                                                                        | 2  |
| 2. Preparation of 2-cyanoaryl acrylamides .....                                                                                     | 2  |
| 3. General procedure for the visible-light enabled HAT catalyzed C=C double bond cleavage reaction of 2-cyanoaryl acrylamides ..... | 3  |
| 4. Characterization of 4-amino-2-quinolones <b>3</b> .....                                                                          | 3  |
| 5. Gram-scale preparation .....                                                                                                     | 9  |
| 6. Mechanistic Studies .....                                                                                                        | 9  |
| 7. References .....                                                                                                                 | 13 |
| 8. NMR spectra .....                                                                                                                | 14 |

## 1. General information

The reactions involved in this article were performed in 10 mL tube or 100 mL round-bottom flask. Unless otherwise noted, all solvents and reagents were obtained from commercial sources. For chromatography, 200-300 mesh silica gel (Qingdao, China) was used. Melting points (mp) were taken on a MEL-TEMP® apparatus and were uncorrected. <sup>1</sup>H NMR, <sup>13</sup>C NMR and <sup>19</sup>F NMR spectras were measured recorded on 400 M spectrometer in CDCl<sub>3</sub> or DMSO-*d*<sub>6</sub> solution. HRMS was measured in ESI mode and the mass analyzer of the HRMS was TOF. MS was performed on Thermo MAT95XP. Chemical shifts ( $\delta$ ) were given in ppm, referenced to the residual proton resonance of CDCl<sub>3</sub> (7.26) or DMSO-*d*<sub>6</sub> (2.50), to the carbon resonance of CDCl<sub>3</sub> (77.16) or DMSO-*d*<sub>6</sub> (39.52). Coupling constants (*J*) were given in Hertz (Hz). The term m, q, t, d, s referred to multiplet, quartet, triplet, doublet, singlet.

## 2. Preparation of 2-cyanoaryl acrylamides

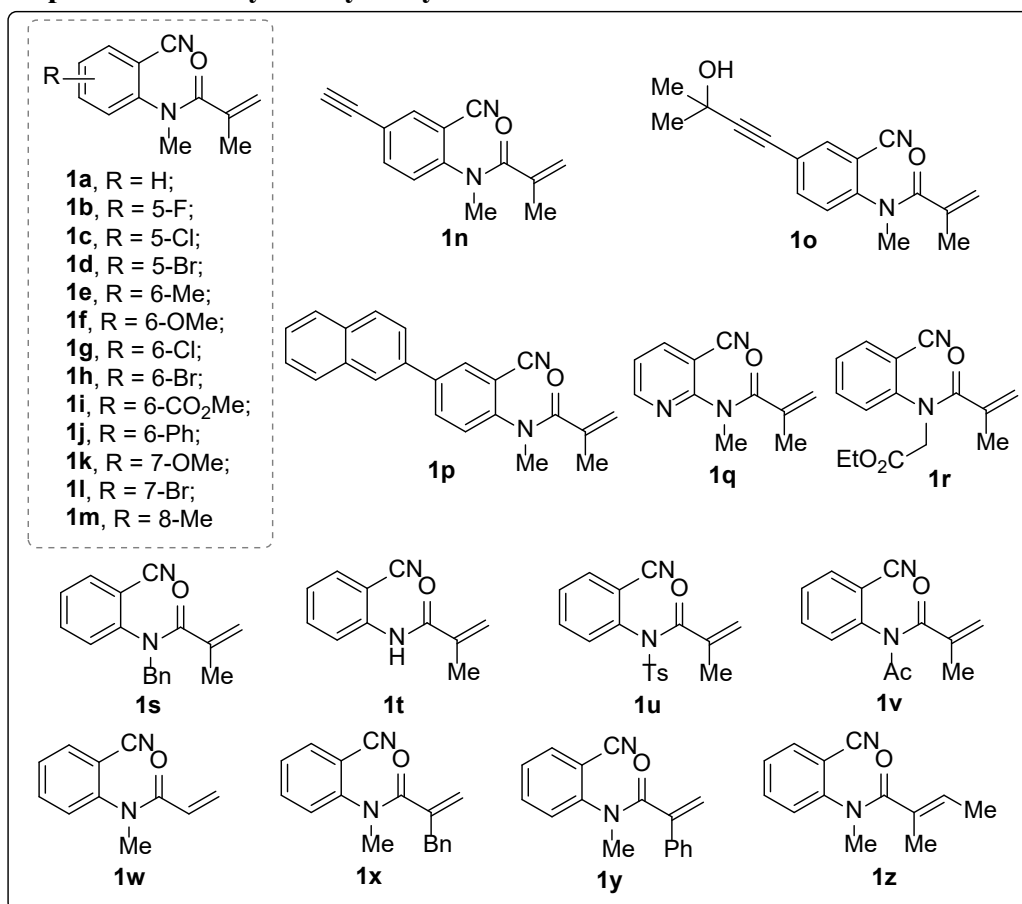

Scheme S1 The structure of synthesized substrates.

All 2-cyanoaryl acrylamides were prepared according to the literature procedures.<sup>1</sup> And the characterization data of new compounds are given below:

### N-(3-cyano-[1,1'-biphenyl]-4-yl)-N-methylmethacrylamide (**1j**)

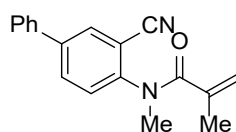

White solid (86%, 715.9 mg, eluent: petroleum ether/ethyl acetate = 2/1); mp 79 -80 °C; <sup>1</sup>H NMR (400

MHz, CDCl<sub>3</sub>)  $\delta$  7.87 (d,  $J$  = 2.0 Hz, 1H), 7.80 (dd,  $J$  = 8.3, 2.1 Hz, 1H), 7.55 (d,  $J$  = 7.2 Hz, 2H), 7.48 (t,  $J$  = 7.3 Hz, 2H), 7.42 (t,  $J$  = 7.2 Hz, 1H), 7.32 (d,  $J$  = 8.3 Hz, 1H), 5.15 (s, 1H), 5.07 (s, 1H), 3.42 (s, 3H), 1.92 (s, 3H); <sup>13</sup>C NMR (100 MHz, CDCl<sub>3</sub>)  $\delta$  171.8, 146.3, 141.3, 140.0, 137.9, 132.5, 132.1, 129.3, 129.1, 128.8, 127.1, 120.1, 116.4, 112.3, 37.9, 20.2; HRMS (ESI) calcd. for C<sub>18</sub>H<sub>16</sub>N<sub>2</sub>ONa [(M+Na)<sup>+</sup>] 299.1148, found: 299.1158.

#### N-(2-cyano-4-(naphthalen-2-yl)phenyl)-N-methylmethacrylamide (1p)

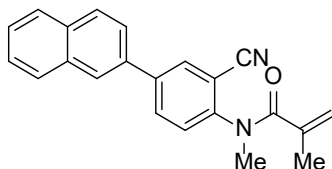

White solid (87%, 565.2 mg, eluent: petroleum ether/ethyl acetate = 2/1); mp 102-103 °C; <sup>1</sup>H NMR (400 MHz, CDCl<sub>3</sub>)  $\delta$  8.05 – 8.00 (m, 2H), 7.98 – 7.87 (m, 4H), 7.68 (dd,  $J$  = 8.5, 1.8 Hz, 1H), 7.59 – 7.52 (m, 2H), 7.36 (d,  $J$  = 8.3 Hz, 1H), 5.18 (s, 1H), 5.11 (s, 1H), 3.45 (s, 3H), 1.95 (s, 3H); <sup>13</sup>C NMR (100 MHz, CDCl<sub>3</sub>)  $\delta$  171.9, 146.4, 141.2, 140.1, 135.2, 133.6, 133.2, 132.7, 132.4, 129.3, 129.2, 128.4, 127.9, 127.0, 126.9, 126.4, 124.7, 120.2, 116.4, 112.5, 37.9, 20.3; HRMS (ESI) calcd. for C<sub>22</sub>H<sub>18</sub>N<sub>2</sub>ONa [(M+Na)<sup>+</sup>] 349.1312, found: 349.1322.

### 3. General procedure for the visible-light enabled HAT catalyzed C=C double bond cleavage reaction of 2-cyanoaryl acrylamides

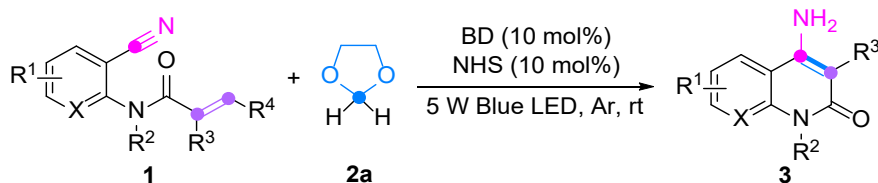

A 10 mL tube was charged with 2-cyanoaryl acrylamides **1** (0.2 mmol), BD (10 mol%) and NHS (10 mol%), 1,3-dioxolane (**2a**, 2 mL) was added via a syringe under argon. The resulting solution was stirred at room temperature with the irradiation of a 5 W blue LED for 48 h. After the reaction was completed, the volatile compounds were removed in vacuo and the residue was purified by column chromatography to give the desired 4-amino-2-quinolones **3**.

### 4. Characterization of 4-amino-2-quinolones **3**

#### 4-amino-1,3-dimethylquinolin-2(1H)-one (**3a**)<sup>1</sup>

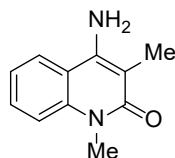

White solid (92%, 34.6 mg, eluent: petroleum ether/ethyl acetate = 1/2); mp 186-187 °C; <sup>1</sup>H NMR (400 MHz, DMSO-*d*<sub>6</sub>)  $\delta$  8.01 (dd,  $J$  = 8.1, 1.1 Hz, 1H), 7.54 – 7.47 (m, 1H), 7.38 (d,  $J$  = 8.1 Hz, 1H), 7.21 – 7.13 (m, 1H), 6.16 (s, 2H), 3.54 (s, 3H), 1.98 (s, 3H); <sup>13</sup>C NMR (100 MHz, DMSO-*d*<sub>6</sub>)  $\delta$  162.0, 147.3, 138.4, 129.6, 122.7, 120.5, 114.6, 114.3, 99.4, 28.9, 10.9; EI-MS ( $m/z$ , relative intensity): 188 (M<sup>+</sup>, 100), 173 (25), 159 (70), 145 (30), 117 (15), 91 (10), 77 (23).

#### 4-amino-5-fluoro-1,3-dimethylquinolin-2(1H)-one (**3b**)<sup>1</sup>

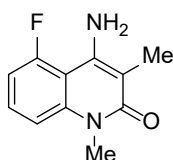

White solid (82%, 33.8 mg, eluent: petroleum ether/ethyl acetate = 1/2); mp 175-176 °C; <sup>1</sup>H NMR (400 MHz, DMSO-*d*<sub>6</sub>) δ 7.54 – 7.44 (m, 1H), 7.27 – 7.19 (m, 1H), 7.05 – 6.94 (m, 1H), 5.93 (s, 2H), 3.53 (s, 3H), 1.96 (s, 3H); <sup>13</sup>C NMR (100 MHz, DMSO-*d*<sub>6</sub>) δ 161.4, 159.3 (d, *J* = 246.4 Hz), 145.7 (d, *J* = 2.7 Hz), 140.3 (d, *J* = 6.3 Hz), 130.0 (d, *J* = 12.1 Hz), 111.1 (d, *J* = 2.9 Hz), 107.7 (d, *J* = 24.7 Hz), 103.8 (d, *J* = 10.4 Hz), 100.4 (d, *J* = 1.9 Hz), 29.8, 10.5; <sup>19</sup>F NMR (376 MHz, DMSO-*d*<sub>6</sub>) δ -114.97; EI-MS (*m/z*, relative intensity): 206 (*M*<sup>+</sup>, 100), 191 (33), 177 (50), 163 (22), 135 (7), 89 (10).

**4-amino-5-chloro-1,3-dimethylquinolin-2(1H)-one (3c)<sup>1</sup>**

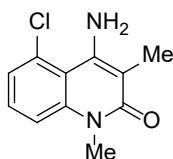

White solid (48%, 21.3 mg, eluent: petroleum ether/ethyl acetate = 1/2); mp 175-177 °C; <sup>1</sup>H NMR (400 MHz, DMSO-*d*<sub>6</sub>) δ 7.50 – 7.40 (m, 2H), 7.25 (dd, *J* = 7.3, 1.6 Hz, 1H), 6.26 (s, 2H), 3.56 (s, 3H), 1.97 (s, 3H); <sup>13</sup>C NMR (100 MHz, DMSO-*d*<sub>6</sub>) δ 160.9, 146.8, 140.9, 129.5, 128.9, 124.5, 114.7, 111.5, 101.8, 30.1, 11.1; EI-MS (*m/z*, relative intensity): 222 (*M*<sup>+</sup>, 100), 207 (30), 193 (45), 179 (28), 130 (10), 97 (12).

**4-amino-5-bromo-1,3-dimethylquinolin-2(1H)-one (3d)<sup>1</sup>**

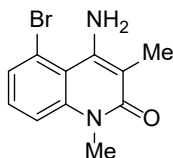

White solid (52%, 27.8 mg, eluent: petroleum ether/ethyl acetate = 1/2); mp 177-179 °C; The catalysts of BD (50 mol%) and NHS (50 mol%) were used. <sup>1</sup>H NMR (400 MHz, DMSO-*d*<sub>6</sub>) δ 7.50 – 7.45 (m, 2H), 7.40 – 7.34 (m, 1H), 6.27 (s, 2H), 3.55 (s, 3H), 1.97 (s, 3H); <sup>13</sup>C NMR (100 MHz, DMSO-*d*<sub>6</sub>) δ 160.9, 146.6, 141.0, 129.9, 128.5, 117.0, 115.3, 112.4, 101.9, 30.1, 11.3; EI-MS (*m/z*, relative intensity): 266 (*M*<sup>+</sup>, 3), 218 (100), 207 (30), 175 (15), 131 (8), 95 (5), 73 (5).

**4-amino-1,3,6-trimethylquinolin-2(1H)-one (3e)<sup>1</sup>**

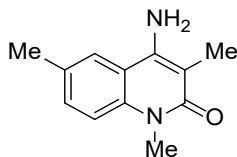

White solid (92%, 37.2 mg, eluent: petroleum ether/ethyl acetate = 1/2); mp 182-184 °C; <sup>1</sup>H NMR (400 MHz, DMSO-*d*<sub>6</sub>) δ 7.83 (s, 1H), 7.35 – 7.23 (m, 2H), 6.07 (s, 2H), 3.51 (s, 3H), 2.37 (s, 3H), 1.97 (s, 3H); <sup>13</sup>C NMR (100 MHz, DMSO-*d*<sub>6</sub>) δ 161.9, 147.1, 136.5, 130.6, 129.4, 122.5, 114.4, 114.2, 99.5, 28.9, 20.4, 10.9; EI-MS (*m/z*, relative intensity): 202 (*M*<sup>+</sup>, 100), 188 (50), 173 (77), 159 (55), 86 (20), 77 (17).

**4-amino-6-methoxy-1,3-dimethylquinolin-2(1H)-one (3f)<sup>1</sup>**

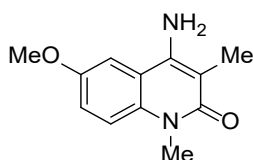

White solid (81%, 35.3 mg, eluent: petroleum ether/ethyl acetate = 1/2); mp 200-202 °C; <sup>1</sup>H NMR (400 MHz, DMSO-*d*<sub>6</sub>) δ 7.53 (d, *J* = 2.7 Hz, 1H), 7.32 (d, *J* = 9.2 Hz, 1H), 7.14 (dd, *J* = 9.1, 2.7 Hz, 1H), 6.11 (s, 2H), 3.82 (s, 3H), 3.52 (s, 3H), 1.98 (s, 3H); <sup>13</sup>C NMR (100 MHz, DMSO-*d*<sub>6</sub>) δ 161.6, 153.7, 146.9, 133.0, 117.6, 115.6, 115.2, 105.8, 99.9, 55.7, 29.0, 11.0; EI-MS (*m/z*, relative intensity): 218 (M<sup>+</sup>, 100), 203 (77), 189 (20), 147 (15), 109 (12), 77 (10).

**4-amino-6-chloro-1,3-dimethylquinolin-2(1H)-one (3g)<sup>1</sup>**

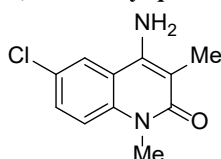

White solid (81%, 35.3 mg, eluent: petroleum ether/ethyl acetate = 1/2); mp 186-187 °C; <sup>1</sup>H NMR (400 MHz, DMSO-*d*<sub>6</sub>) δ 8.12 (d, *J* = 2.3 Hz, 1H), 7.52 (dd, *J* = 9.0, 2.3 Hz, 1H), 7.39 (d, *J* = 9.0 Hz, 1H), 6.22 (s, 2H), 3.52 (s, 3H), 1.97 (s, 3H); <sup>13</sup>C NMR (100 MHz, DMSO-*d*<sub>6</sub>) δ 161.8, 146.4, 137.2, 129.2, 125.2, 122.1, 116.4, 115.9, 100.6, 29.1, 10.9; EI-MS (*m/z*, relative intensity): 222 (M<sup>+</sup>, 100), 207 (40), 193 (65), 179 (30), 130 (17), 97 (20).

**4-amino-6-bromo-1,3-dimethylquinolin-2(1H)-one (3h)<sup>1</sup>**

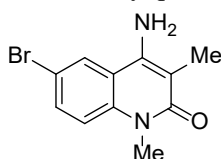

White solid (79%, 42.2 mg, eluent: petroleum ether/ethyl acetate = 1/2); mp 164-166 °C; <sup>1</sup>H NMR (400 MHz, DMSO-*d*<sub>6</sub>) δ 8.24 (d, *J* = 2.1 Hz, 1H), 7.62 (dd, *J* = 9.0, 2.1 Hz, 1H), 7.32 (d, *J* = 9.0 Hz, 1H), 6.22 (s, 2H), 3.51 (s, 3H), 1.97 (s, 3H); <sup>13</sup>C NMR (100 MHz, DMSO-*d*<sub>6</sub>) δ 161.8, 146.3, 137.5, 131.9, 125.0, 116.7, 116.4, 113.0, 100.5, 29.1, 10.9; EI-MS (*m/z*, relative intensity): 266 (M<sup>+</sup>, 50), 239 (20), 207 (100), 159 (15), 85 (38), 57 (55).

**methyl 4-amino-1,3-dimethyl-2-oxo-1,2-dihydroquinoline-6-carboxylate (3i)<sup>1</sup>**

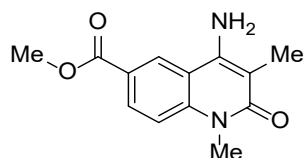

White solid (74%, 36.4 mg, eluent: petroleum ether/ethyl acetate = 1/2); mp 225-226 °C; <sup>1</sup>H NMR (400 MHz, DMSO-*d*<sub>6</sub>) δ 8.61 (d, *J* = 1.3 Hz, 1H), 8.01 (dd, *J* = 8.8, 1.4 Hz, 1H), 7.44 (d, *J* = 8.9 Hz, 1H), 6.36 (s, 2H), 3.87 (s, 3H), 3.55 (s, 3H), 1.97 (s, 3H); <sup>13</sup>C NMR (100 MHz, DMSO-*d*<sub>6</sub>) δ 166.1, 162.1, 147.5, 141.6, 129.9, 124.8, 121.8, 114.7, 114.3, 100.1, 52.0, 29.3, 10.9; EI-MS (*m/z*, relative intensity): 246 (M<sup>+</sup>, 100), 231 (15), 217 (45), 159 (6), 130 (8), 93 (10).

**4-amino-1,3-dimethyl-6-phenylquinolin-2(1H)-one (3j)**

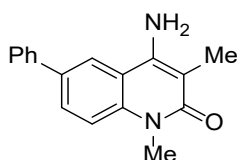

White solid (88%, 46.5 mg, eluent: petroleum ether/ethyl acetate = 1/3); mp 189-190 °C; <sup>1</sup>H NMR (400 MHz, DMSO-*d*<sub>6</sub>) δ 8.34 (d, *J* = 1.8 Hz, 1H), 7.84-7.80 (m, 3H), 7.46 (dd, *J* = 15.6, 8.1 Hz, 3H), 7.35 (t, *J* = 7.3 Hz, 1H), 6.32 (s, 2H), 3.57 (s, 3H), 2.02 (s, 3H); <sup>13</sup>C NMR (100 MHz, DMSO-*d*<sub>6</sub>) δ 162.0, 147.5, 139.4, 137.9, 132.5, 128.8, 127.8, 127.1, 126.6, 120.5, 115.0, 114.9, 99.7, 29.0, 10.9; HRMS (ESI) calcd. for C<sub>17</sub>H<sub>16</sub>N<sub>2</sub>O [(M+H)<sup>+</sup>] 265.1336, found: 265.1346.

#### 4-amino-7-methoxy-1,3-dimethylquinolin-2(1H)-one (3k)<sup>1</sup>

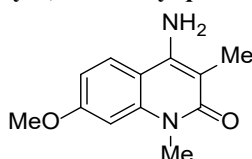

White solid (80%, 34.9 mg, eluent: petroleum ether/ethyl acetate = 1/2); mp 172-173 °C; <sup>1</sup>H NMR (400 MHz, DMSO-*d*<sub>6</sub>) δ 7.93 (d, *J* = 9.6 Hz, 1H), 6.79 (dd, *J* = 6.1, 2.4 Hz, 2H), 6.08 (s, 2H), 3.86 (s, 3H), 3.52 (s, 3H), 1.95 (s, 3H); <sup>13</sup>C NMR (100 MHz, DMSO-*d*<sub>6</sub>) δ 162.4, 160.5, 147.5, 140.1, 124.3, 108.5, 108.1, 98.4, 97.1, 55.4, 29.0, 10.7; EI-MS (*m/z*, relative intensity): 218 (M<sup>+</sup>, 100), 203 (75), 189 (20), 147 (15), 109 (10), 77 (8).

#### 4-amino-7-bromo-1,3-dimethylquinolin-2(1H)-one (3l)<sup>1</sup>

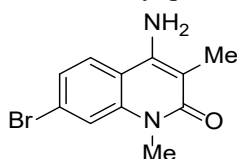

White solid (76%, 40.6 mg, eluent: petroleum ether/ethyl acetate = 1/2); mp 224-225 °C; <sup>1</sup>H NMR (400 MHz, DMSO-*d*<sub>6</sub>) δ 7.93 (d, *J* = 8.5 Hz, 1H), 7.55 (s, 1H), 7.33 (d, *J* = 8.3 Hz, 1H), 6.21 (s, 2H), 3.52 (s, 3H), 1.95 (s, 3H); <sup>13</sup>C NMR (100 MHz, DMSO-*d*<sub>6</sub>) δ 161.9, 147.0, 139.6, 124.7, 123.4, 123.0, 116.9, 113.8, 99.9, 29.2, 10.9; EI-MS (*m/z*, relative intensity): 266 (M<sup>+</sup>, 10), 253 (12), 191 (10), 133 (8), 96 (10), 73 (7).

#### 4-amino-1,3,8-trimethylquinolin-2(1H)-one (3m)<sup>1</sup>

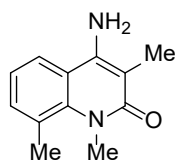

White solid (77%, 31.1 mg, eluent: petroleum ether/ethyl acetate = 1/2); mp 207-209 °C; The catalysts of BD (50 mol%) and NHS (50 mol%) were used. <sup>1</sup>H NMR (400 MHz, DMSO-*d*<sub>6</sub>) δ 7.81 (d, *J* = 7.7 Hz, 1H), 7.30 (d, *J* = 7.2 Hz, 1H), 7.07 (t, *J* = 7.7 Hz, 1H), 6.07 (s, 2H), 3.57 (s, 3H), 2.59 (s, 3H), 1.95 (s, 3H); <sup>13</sup>C NMR (100 MHz, DMSO-*d*<sub>6</sub>) δ 164.4, 147.7, 140.1, 133.8, 124.8, 121.0, 120.6, 116.6, 99.2, 36.6, 23.4, 10.8; EI-MS (*m/z*, relative intensity): 202 (M<sup>+</sup>, 100), 187 (80), 173 (22), 159 (45), 115 (8), 77 (10).

#### 4-amino-6-ethynyl-1,3-dimethylquinolin-2(1H)-one (3n)<sup>1</sup>

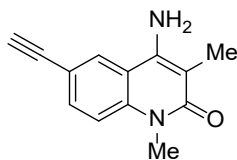

White solid (59%, 25.0 mg, eluent: petroleum ether/ethyl acetate = 1/2); mp 181-182 °C; The catalysts of BD (50 mol%) and NHS (50 mol%) were used. <sup>1</sup>H NMR (400 MHz, DMSO-*d*<sub>6</sub>) δ 8.20 (d, *J* = 1.7 Hz, 1H), 7.58 (dd, *J* = 8.7, 1.7 Hz, 1H), 7.39 (d, *J* = 8.8 Hz, 1H), 6.25 (s, 2H), 4.14 (s, 1H), 3.53 (s, 3H), 1.96 (s, 3H); <sup>13</sup>C NMR (100 MHz, DMSO-*d*<sub>6</sub>) δ 161.9, 146.7, 138.5, 132.5, 126.4, 114.9, 114.6, 113.8, 100.1, 83.6, 79.9, 29.1, 10.9; EI-MS (*m/z*, relative intensity): 212 (M<sup>+</sup>, 100), 197 (14), 183 (40), 169 (16), 115 (5), 57 (10).

**4-amino-6-(3-hydroxy-3-methylbut-1-yn-1-yl)-1,3-dimethylquinolin-2(1H)-one (3o)<sup>1</sup>**

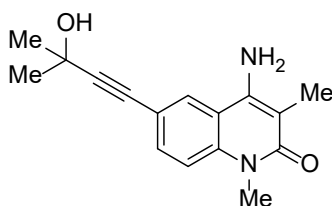

White solid (74%, 40.0 mg, eluent: petroleum ether/ethyl acetate = 1/3); mp 245-247 °C; <sup>1</sup>H NMR (400 MHz, DMSO-*d*<sub>6</sub>) δ 8.10 (d, *J* = 1.6 Hz, 1H), 7.49 (dd, *J* = 8.7, 1.6 Hz, 1H), 7.36 (d, *J* = 8.8 Hz, 1H), 6.24 (s, 2H), 5.46 (s, 1H), 3.53 (s, 3H), 1.96 (s, 3H), 1.49 (s, 6H); <sup>13</sup>C NMR (100 MHz, DMSO-*d*<sub>6</sub>) δ 161.9, 146.8, 138.0, 132.3, 125.7, 114.8, 114.8, 114.6, 100.0, 95.1, 80.3, 63.7, 31.7, 29.0, 10.9; EI-MS (*m/z*, relative intensity): 270 (M<sup>+</sup>, 8), 252 (100), 223 (30), 193 (5), 126 (8), 97 (3).

**4-amino-1,3-dimethyl-6-(naphthalen-2-yl)quinolin-2(1H)-one (3p)**

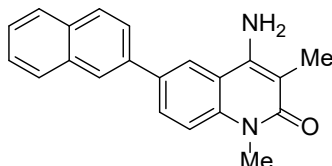

White solid (69%, 43.4 mg, eluent: petroleum ether/ethyl acetate = 1/3); mp 197-198 °C; <sup>1</sup>H NMR (400 MHz, DMSO-*d*<sub>6</sub>) δ 8.50 (d, *J* = 1.6 Hz, 1H), 8.34 (s, 1H), 8.04 – 7.92 (m, 5H), 7.56-7.46 (m, 3H), 6.40 (s, 2H), 3.58 (s, 3H), 2.05 (s, 3H); <sup>13</sup>C NMR (100 MHz, DMSO-*d*<sub>6</sub>) δ 162.0, 147.6, 138.0, 136.8, 133.4, 132.2, 132.1, 128.4, 128.1, 128.1, 127.6, 126.4, 126.0, 125.2, 124.8, 120.8, 115.1, 115.1, 99.8, 29.1, 11.0; HRMS (ESI) calcd. for C<sub>21</sub>H<sub>18</sub>N<sub>2</sub>O [(M+H)<sup>+</sup>] 315.1495, found: 315.1505.

**4-amino-1,3-dimethyl-1,8-naphthyridin-2(1H)-one (3q)<sup>1</sup>**

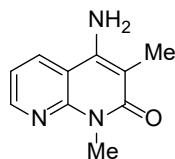

White solid (64%, 24.2 mg, eluent: petroleum ether/ethyl acetate = 1/3); mp 210-211 °C; <sup>1</sup>H NMR (400 MHz, DMSO-*d*<sub>6</sub>) δ 8.52 (d, *J* = 3.4 Hz, 1H), 8.40 (d, *J* = 7.7 Hz, 1H), 7.22 (dd, *J* = 7.0, 4.7 Hz, 1H), 6.31 (s, 2H), 3.59 (s, 3H), 1.98 (s, 3H); <sup>13</sup>C NMR (100 MHz, DMSO-*d*<sub>6</sub>) δ 163.0, 148.9, 148.4, 146.4,

131.4, 116.8, 110.2, 100.1, 27.9, 10.7. EI-MS ( $m/z$ , relative intensity): 189 ( $M^+$ , 90), 161 (80), 146 (40), 133 (15), 96 (15), 87 (20).

**ethyl 2-(4-amino-3-methyl-2-oxoquinolin-1(2H)-yl)acetate (3r)<sup>1</sup>**

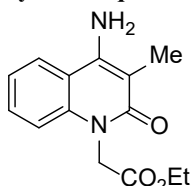

White solid (79%, 41.1 mg, eluent: petroleum ether/ethyl acetate = 1/2); mp 162-164 °C; <sup>1</sup>H NMR (400 MHz, DMSO-*d*<sub>6</sub>) δ 8.04 (d,  $J$  = 8.0 Hz, 1H), 7.48 (t,  $J$  = 7.8 Hz, 1H), 7.26 – 7.15 (m, 2H), 6.30 (s, 2H), 5.04 (s, 2H), 4.13 (q,  $J$  = 7.1 Hz, 2H), 1.99 (s, 3H), 1.19 (t,  $J$  = 7.1 Hz, 3H); <sup>13</sup>C NMR (100 MHz, DMSO-*d*<sub>6</sub>) δ 169.1, 161.9, 148.1, 137.9, 129.7, 122.9, 120.9, 114.6, 114.2, 98.7, 60.8, 43.3, 14.1, 10.7; EI-MS ( $m/z$ , relative intensity): 260 ( $M^+$ , 40), 214 (50), 187 (40), 130 (15), 96 (12), 77 (10).

**4-amino-1-benzyl-3-methylquinolin-2(1H)-one (3s)<sup>1</sup>**

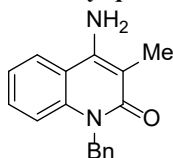

White solid (90%, 47.5 mg, eluent: petroleum ether/ethyl acetate = 1/2); mp 223-224 °C; <sup>1</sup>H NMR (400 MHz, DMSO-*d*<sub>6</sub>) δ 8.07 (d,  $J$  = 7.8 Hz, 1H), 7.37 (t,  $J$  = 7.5 Hz, 1H), 7.29 – 7.10 (m, 7H), 6.32 (s, 2H), 5.47 (s, 2H), 2.06 (s, 3H); <sup>13</sup>C NMR (100 MHz, DMSO-*d*<sub>6</sub>) δ 162.3, 147.9, 138.0, 137.7, 129.6, 128.5, 126.7, 126.4, 123.0, 120.7, 114.9, 114.9, 99.1, 44.5, 11.0; EI-MS ( $m/z$ , relative intensity): 264 ( $M^+$ , 100), 249 (15), 187 (15), 159 (25), 131 (10), 77 (8).

**4-amino-3-benzyl-1-methylquinolin-2(1H)-one (3x)<sup>1</sup>**

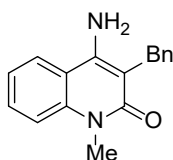

White solid (56%, 29.6 mg, eluent: petroleum ether/ethyl acetate = 1/3); mp 126-128 °C; <sup>1</sup>H NMR (400 MHz, DMSO-*d*<sub>6</sub>) δ 8.03 (d,  $J$  = 8.0 Hz, 1H), 7.58 – 7.50 (m, 1H), 7.43 – 7.36 (m, 1H), 7.29 (d,  $J$  = 7.0 Hz, 2H), 7.20 (t,  $J$  = 7.5 Hz, 3H), 7.14 – 7.06 (m, 1H), 6.29 (s, 2H), 3.93 (s, 2H), 3.56 (s, 3H); <sup>13</sup>C NMR (100 MHz, DMSO-*d*<sub>6</sub>) δ 162.1, 147.7, 141.0, 138.8, 130.1, 128.3, 128.0, 125.5, 123.1, 120.8, 114.7, 114.5, 103.6, 30.0, 29.1; EI-MS ( $m/z$ , relative intensity): 264 ( $M^+$ , 100), 249 (13), 187 (15), 159 (22), 131 (10), 77 (8).

**4-amino-1-methyl-3-phenylquinolin-2(1H)-one (3y)<sup>1</sup>**

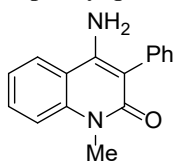

White solid (24%, 12.0 mg, eluent: petroleum ether/ethyl acetate = 1/3); mp 208-209 °C; <sup>1</sup>H NMR (400 MHz, DMSO-*d*<sub>6</sub>) δ 8.08 (d,  $J$  = 8.0 Hz, 1H), 7.64 – 7.57 (m, 1H), 7.48 – 7.41 (m, 3H), 7.35 – 7.20



(m, 4H), 5.82 (s, 2H), 3.56 (s, 3H);  $^{13}\text{C}$  NMR (100 MHz,  $\text{DMSO-}d_6$ )  $\delta$  161.0, 147.5, 139.3, 135.6, 131.0, 130.7, 128.5, 126.8, 123.6, 120.9, 114.6, 114.5, 106.1, 28.9; EI-MS ( $m/z$ , relative intensity): 250 ( $\text{M}^+$ , 65), 234 (13), 165 (4), 125 (7), 95 (5), 77 (5).

## 5. Gram-scale preparation

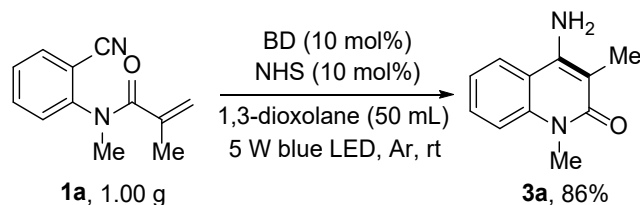

A 100 mL oven-dried round bottom flask equipped with a magnetic stirring bar was added **1a** (5.0 mmol, 1.00 g), BD (10 mol%) and NHS (10 mol%), 1,3-dioxolane (**2a**, 50 mL). The reaction flask was purged with argon for three times and connected with an argon balloon. The reaction flask was stirred at room temperature with the irradiation of 5 W blue LEDs for 48 h. After the reaction was completed, the volatile compounds were removed in vacuo and the residue was purified by column chromatography on silica gel (petroleum ether/ethyl acetate = 1/2) to give the desired product **3a** as white solid, 0.8084 g, 86% yield.

## 6. Mechanistic Studies<sup>2-5</sup>

### (1) Control experiments with respect to TEMPO and BHT

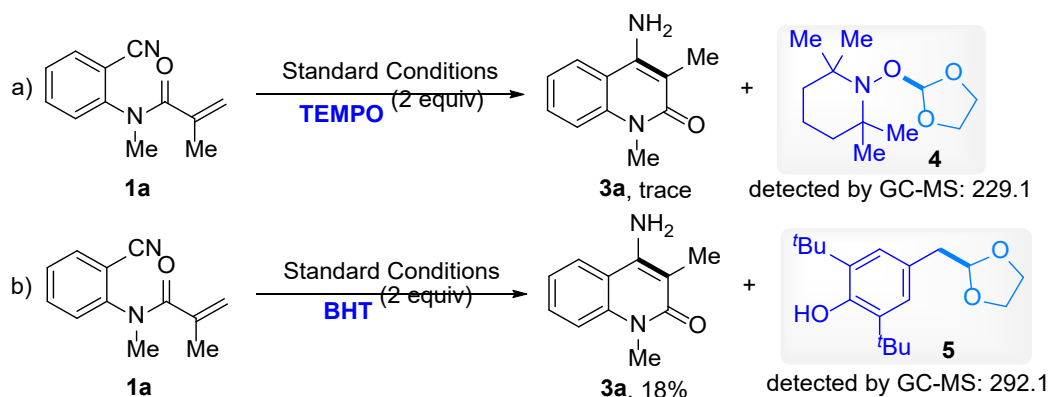

A 10 mL tube was charged with **1a** (0.2 mmol, 40.0 mg), BD (10 mol%), NHS (10 mol%) and TEMPO (0.4 mmol, 2 equiv, 62.5 mg) or BHT (0.4 mmol, 2 equiv, 88.1 mg), 1,3-dioxolane (**2a**, 2 mL) was added via a syringe under argon. The resulting solution was stirred at room temperature with the irradiation of a 5 W blue LED for 48 h. The mixtures were detected by GC-MS (EI mode). The spectra were as depicted in Figures S1 and S2.

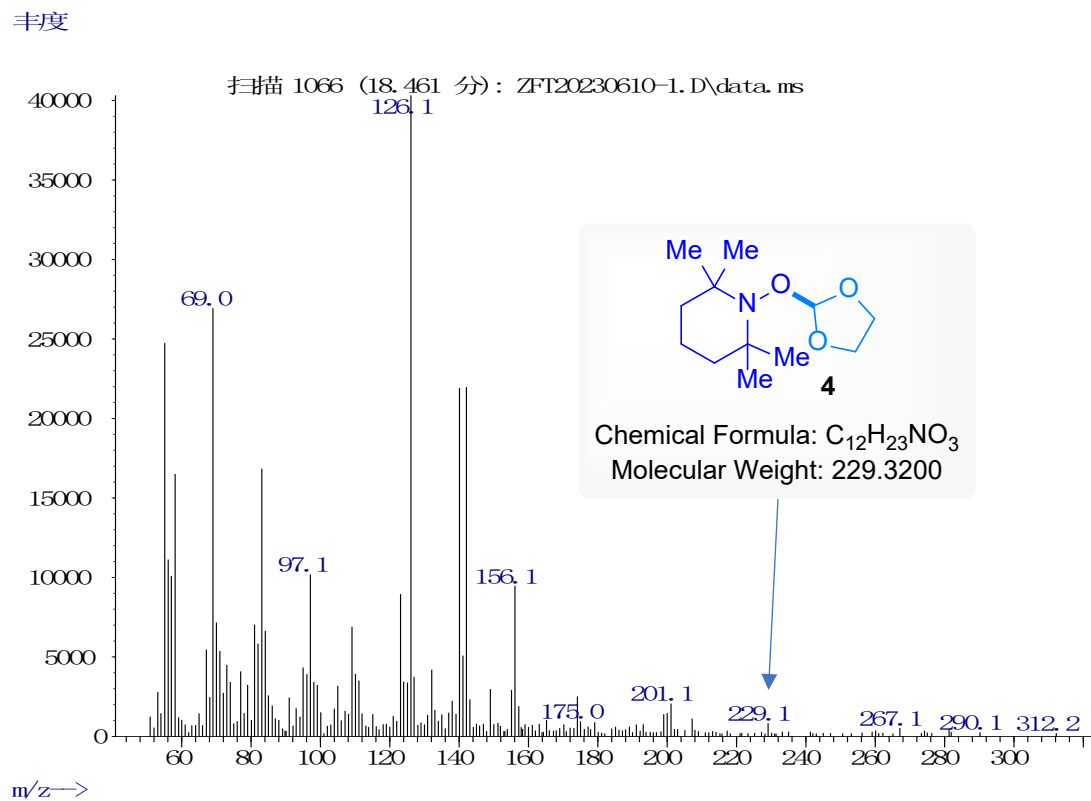

Figure S1 GC-MS spectra for compound 4

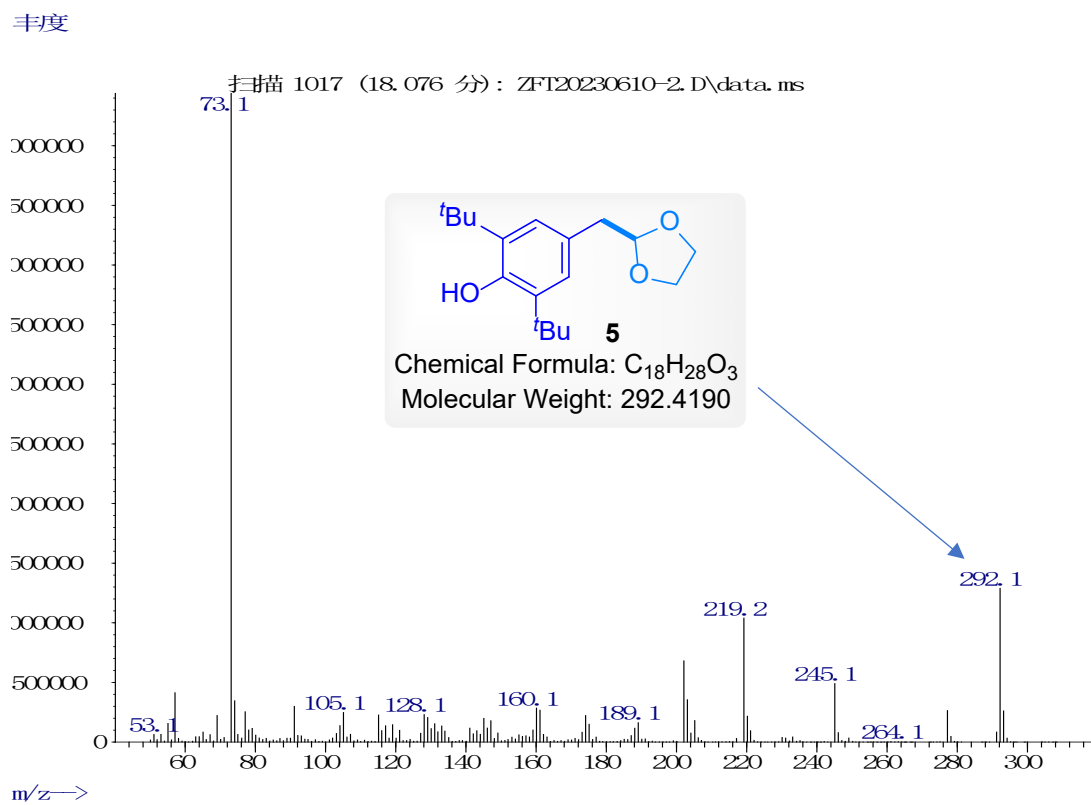

Figure S2 GC-MS spectra for compound 5

## (2) Control experiments with respect to 1,3-benzodioxole

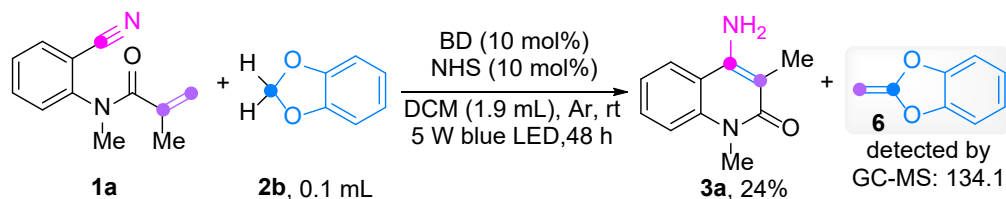

A 10 mL tube was charged with **1a** (0.2 mmol, 40.0 mg), BD (10 mol%) and NHS (10 mol%), 1,3-benzodioxole (**2b**, 0.1 mL) and dichloromethane (DCM, 1.9 mL) was added via a syringe under argon. The resulting solution was stirred at room temperature with the irradiation of a 5 W blue LED for 48 h. The mixtures were detected by GC-MS (EI mode). The spectra was as depicted in Figure S3.

丰度

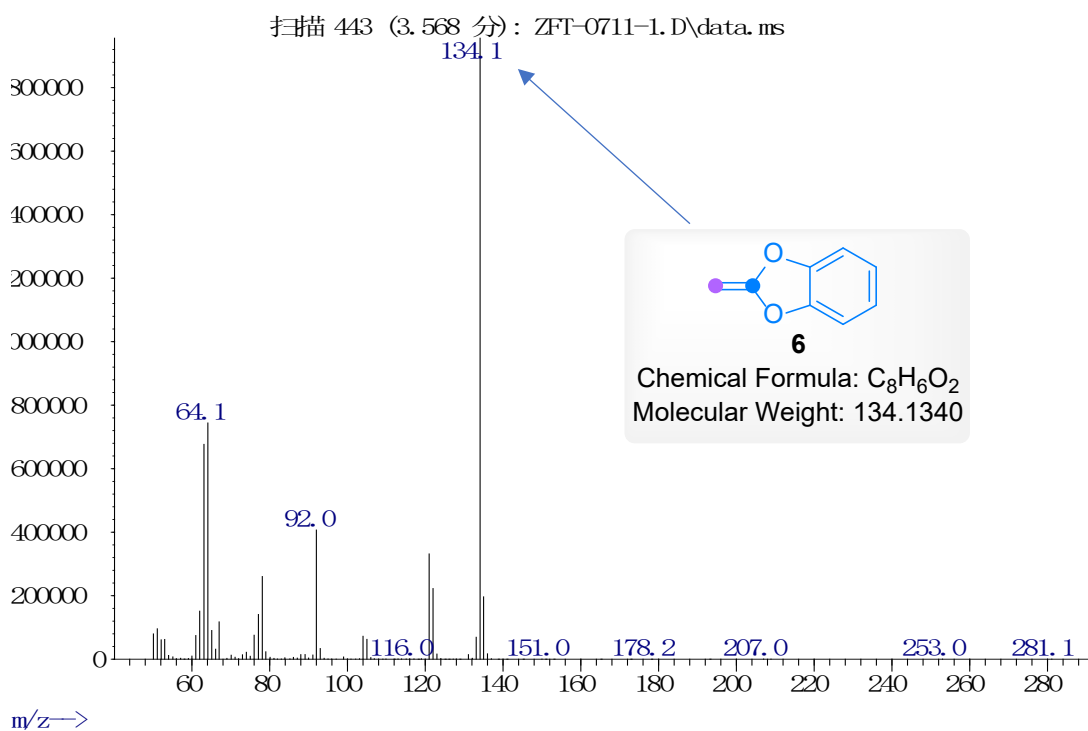

Figure S3 GC-MS spectra for compound **6**

### (3) The light on/off experiment

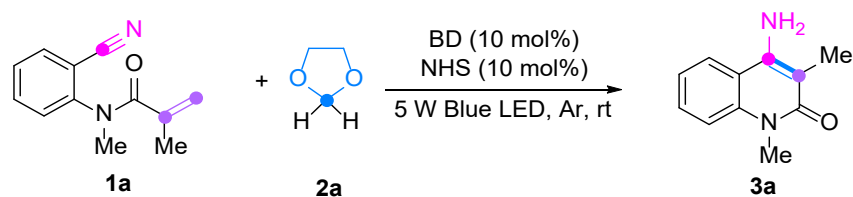

A 10 mL tube was charged with 2-cyanoaryl acrylamides **1a** (0.5 mmol), BD (10 mol%), NHS (10 mol%) and 1,3,5-trimethylbenzene (0.5 mmol) 1,3-dioxolane (**2a**, 5 mL) was added via a syringe under argon. The reaction mixture was stirred under alternating periods (1 h) of irradiation and darkness. 100  $\mu$ L of reaction mixture was taken by a syringe at indicated time (1.0 h, 2.0 h, 3.0 h, 4.0 h, 5.0 h, 6.0 h) and diluted with chloroform-*d* (0.5 mL) and submitted for quantitative  $^1\text{H}$  NMR analysis. The results were list in Table S1 and Figure S4.

**Table S1** The data of the light on/off experiment

| Time | Yield (%) |
|------|-----------|
| 0 h  | 0         |
| 1 h  | 31        |
| 2 h  | 32        |
| 3 h  | 39        |
| 4 h  | 40        |
| 5 h  | 50        |
| 6 h  | 50        |

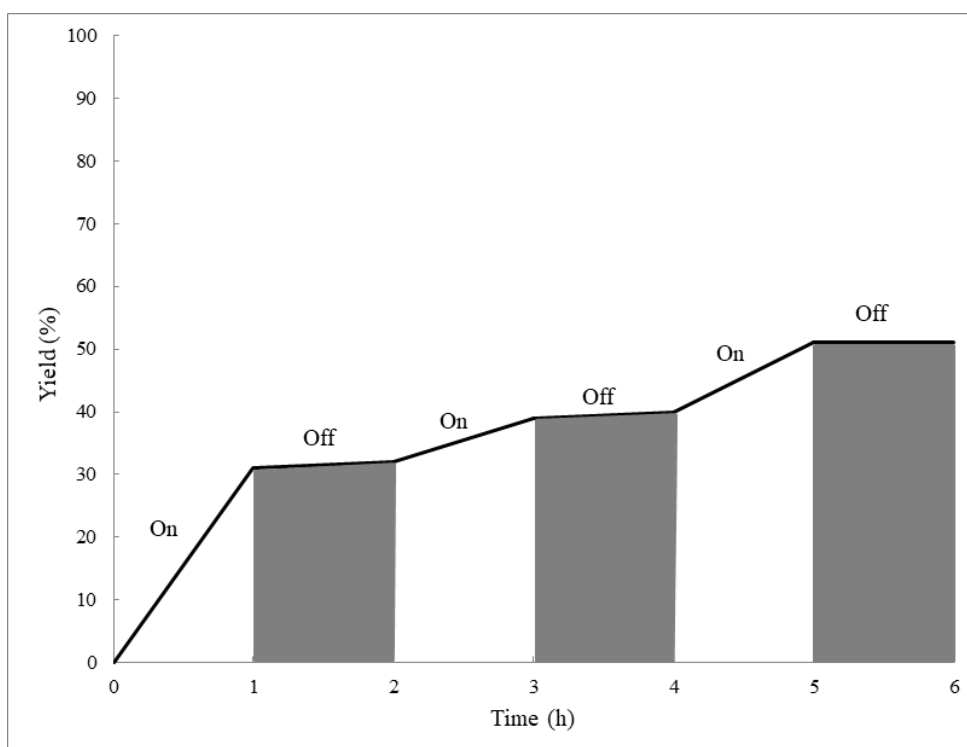

**Figure S4** Light on/off experiment

#### (4) The experiment on detecting BD after completing the reaction

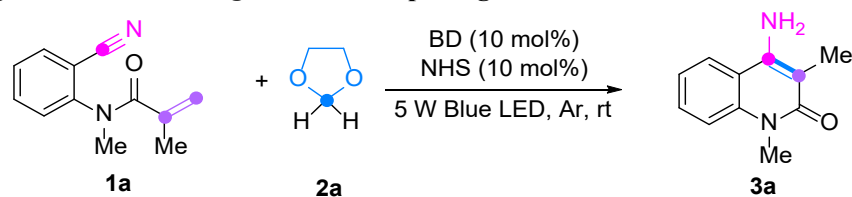

A 10 mL tube was charged with 2-cyanoaryl acrylamides **1a** (0.2 mmol), BD (10 mol%) and NHS (10 mol%), 1,3-dioxolane (**2a**, 2 mL) was added via a syringe under argon. The resulting solution was stirred at room temperature with the irradiation of a 5 W blue LED. After the reaction was completed, the mixtures were detected by GC-MS (EI mode). The spectra of **BD** was as depicted in Figure S5.

丰度

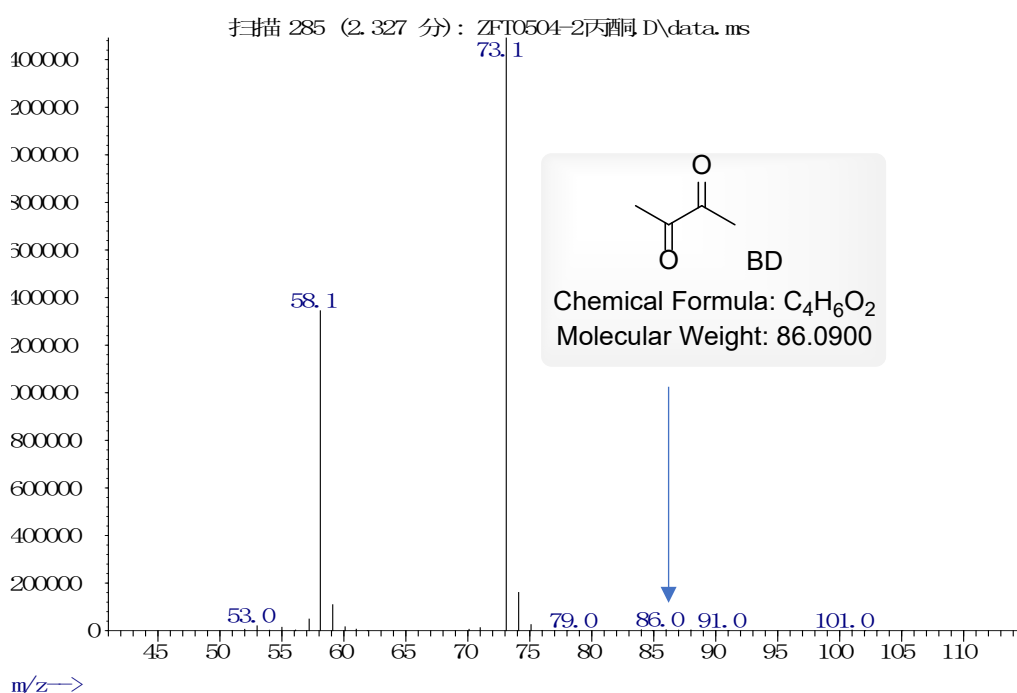

Figure S5 GC-MS spectra for **BD**

## 7. References

- (1) W.-J. Xia, T.-G. Fan, Z.-W. Zhao, X. Chen, X.-X. Wang and Y.-M. Li, *Org. Lett.*, 2021, **23**, 6158.
- (2) P. Du, H. Li, Y. Wang, J. Cheng and X. Wan, *Org. Lett.*, 2014, **16**, 6350.
- (3) K. Sun, G. Li, Y. Li, J. Yu, Q. Zhao, Z. Zhang and G. Zhang, *Adv. Synth. Catal.*, 2020, **362**, 1947.
- (4) S. Jiang, X.-J. Tian, S.-Y. Feng, J.-S. Li, Z.-W. Li, C.-H. Lu, C.-J. Li and W.-D. Liu, *Org. Lett.*, 2020, **22**, 692.
- (5) S. G. More, R. B. Kamble and G. Suryavanshi, *J. Org. Chem.*, 2021, **86**, 2107.

## 8. NMR spectra

$^1\text{H}$  NMR of **1j** (400 MHz,  $\text{CDCl}_3$ ):

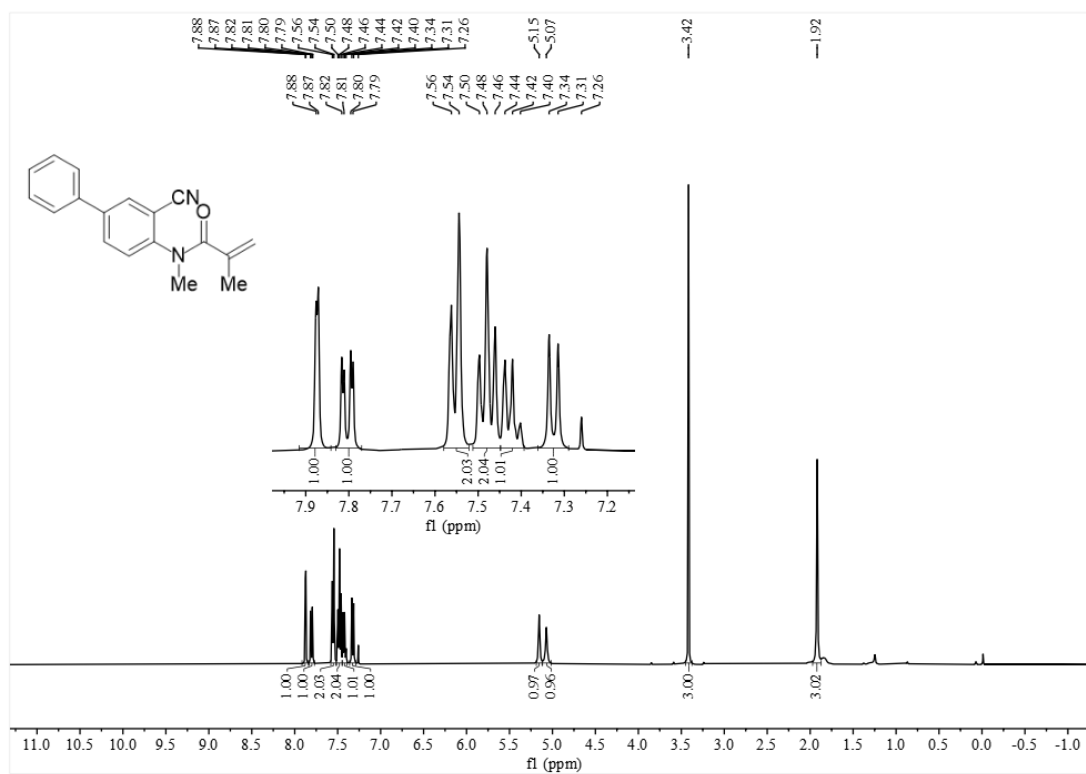

$^{13}\text{C}$  NMR of **1j** (100 MHz,  $\text{CDCl}_3$ ):

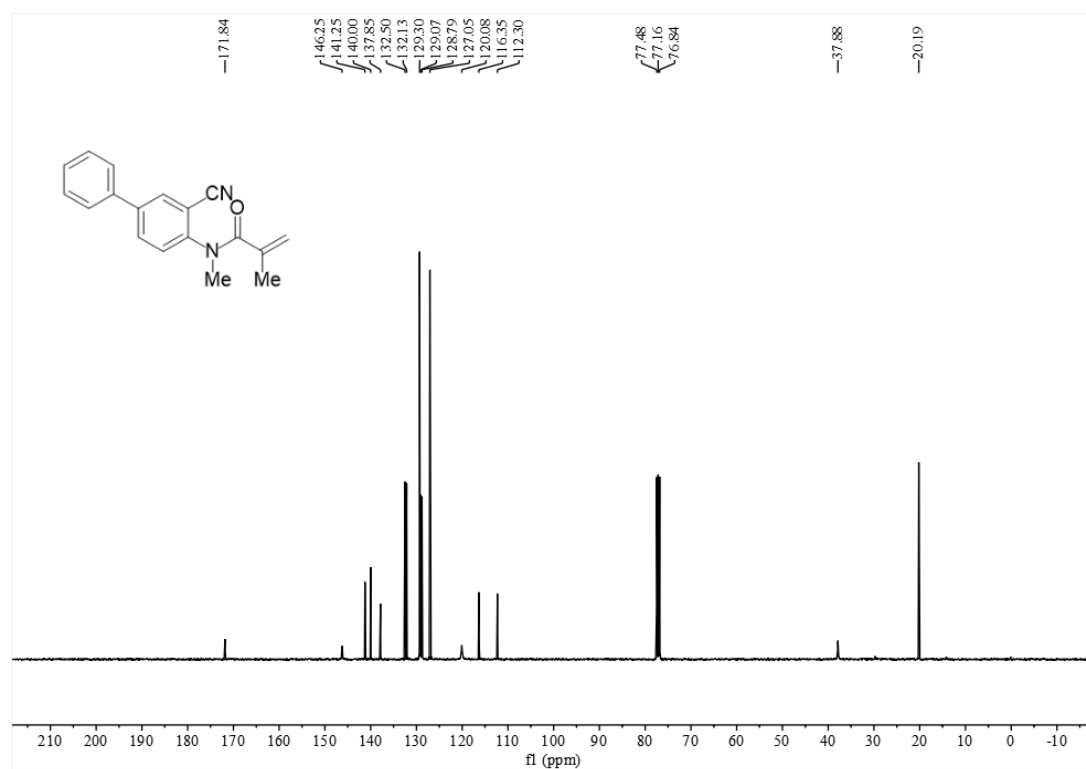

<sup>1</sup>H NMR of **1p** (400 MHz, CDCl<sub>3</sub>):

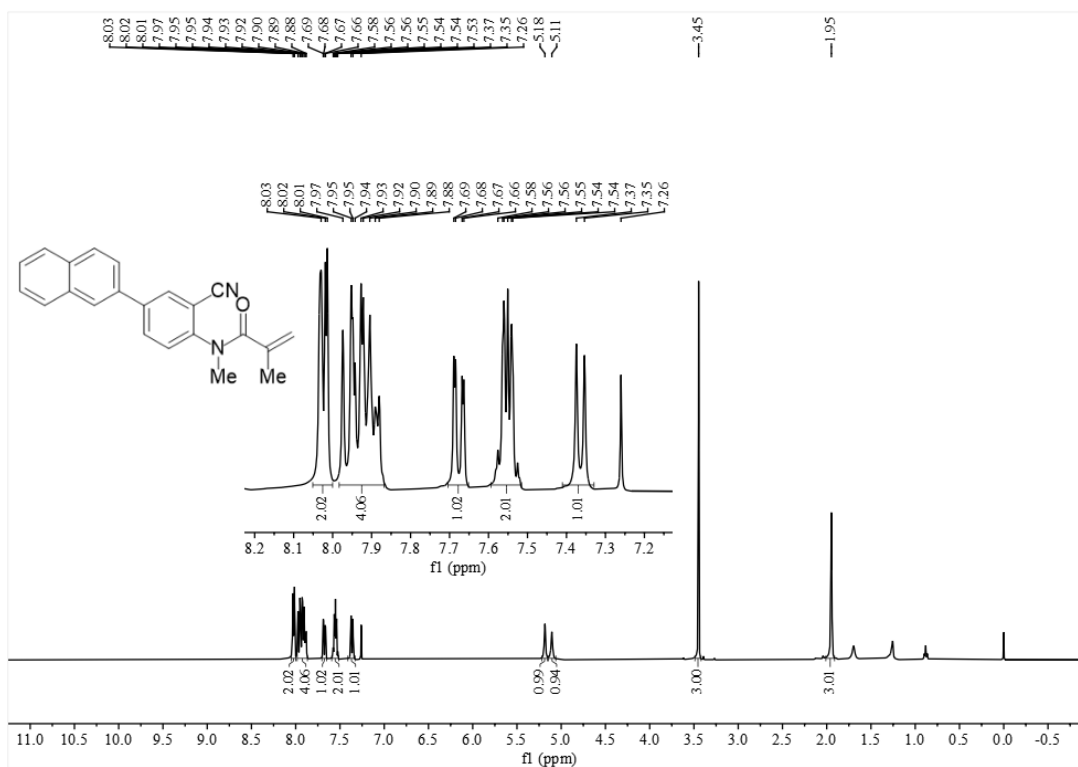

<sup>13</sup>C NMR of **1p** (100 MHz, CDCl<sub>3</sub>):

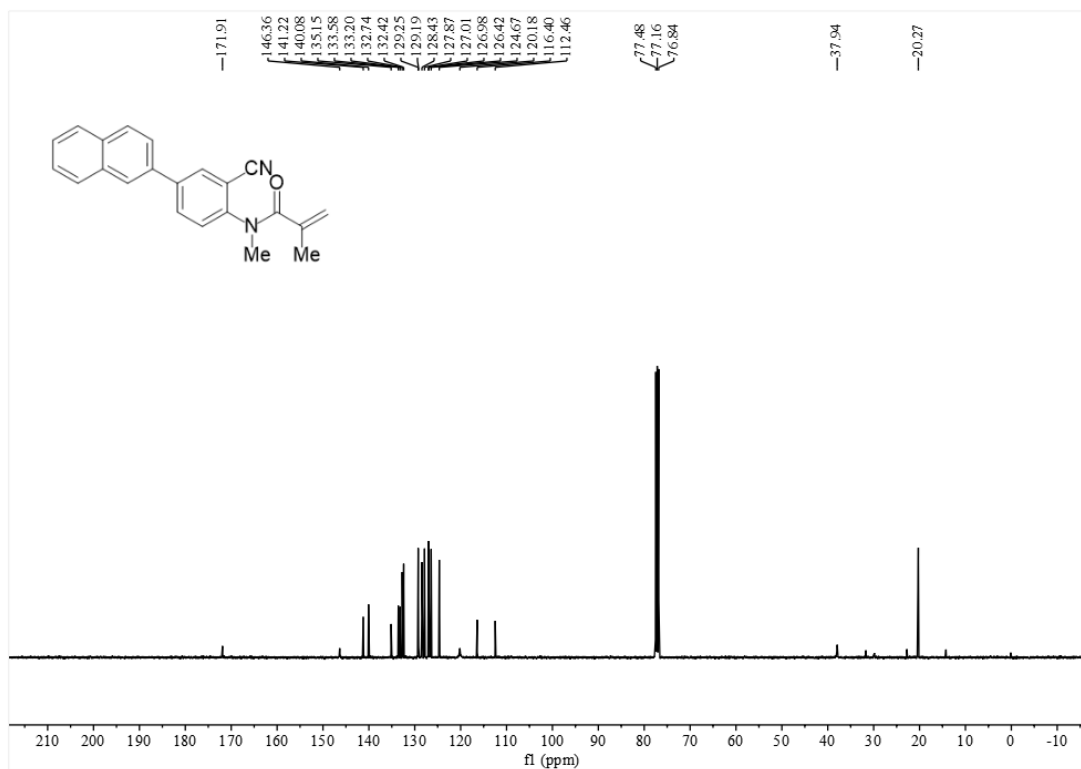

<sup>1</sup>H NMR of **3a** (400 MHz, DMSO-*d*<sub>6</sub>):

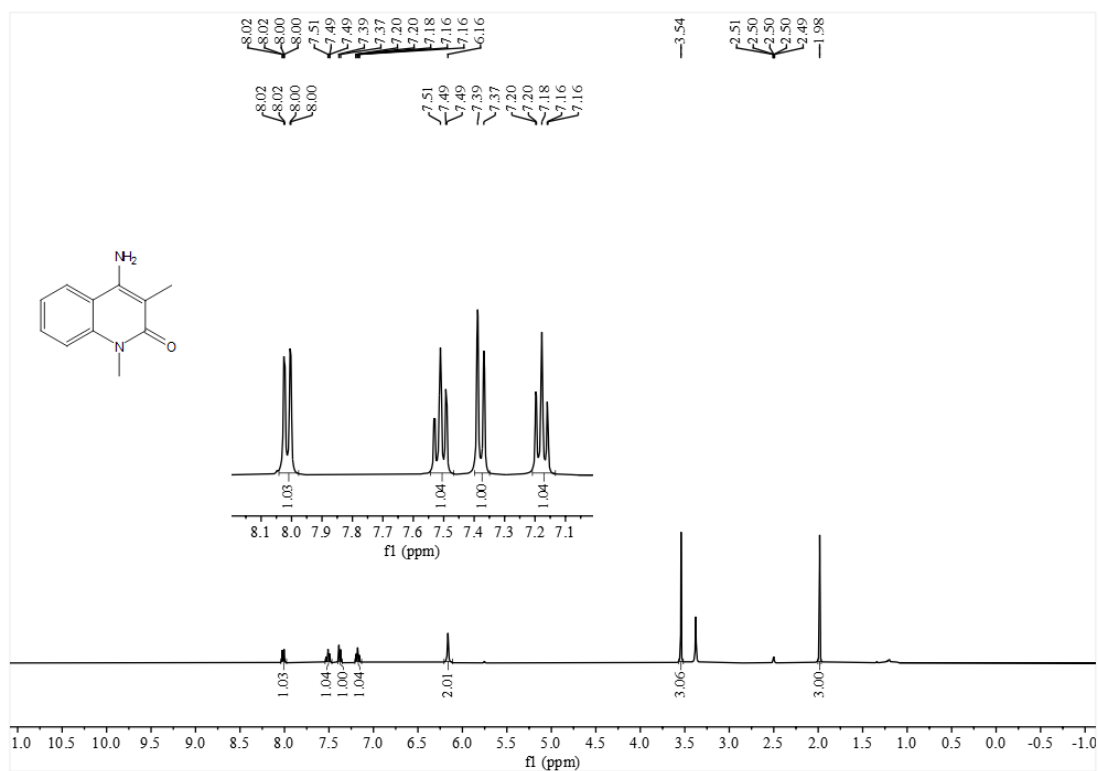

<sup>13</sup>C NMR of **3a** (100 MHz, DMSO-*d*<sub>6</sub>):

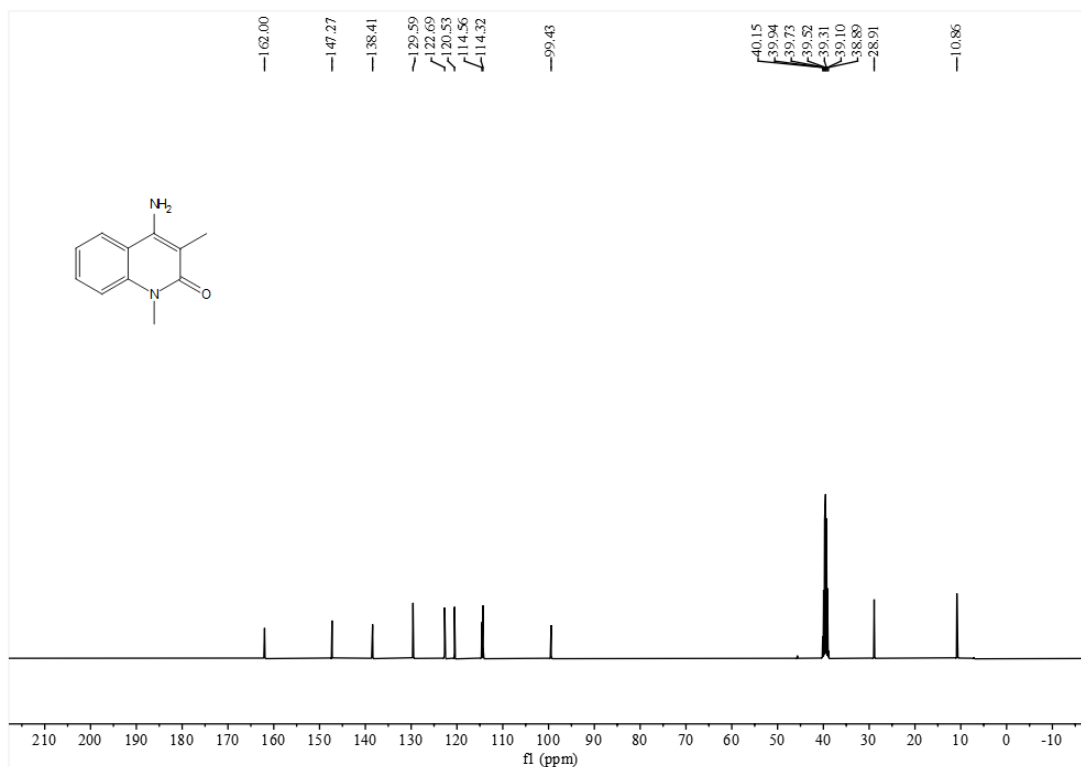



<sup>1</sup>H NMR of **3b** (400 MHz, DMSO-*d*<sub>6</sub>):

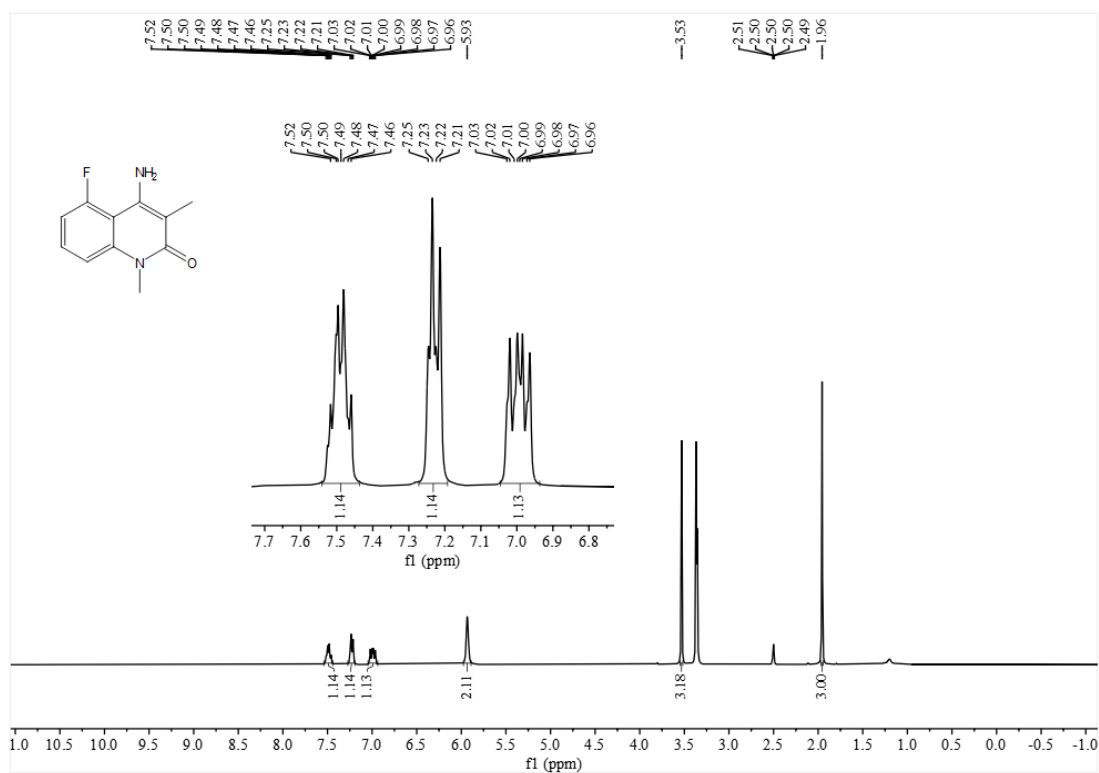

<sup>13</sup>C NMR of **3b** (100 MHz, DMSO-*d*<sub>6</sub>):

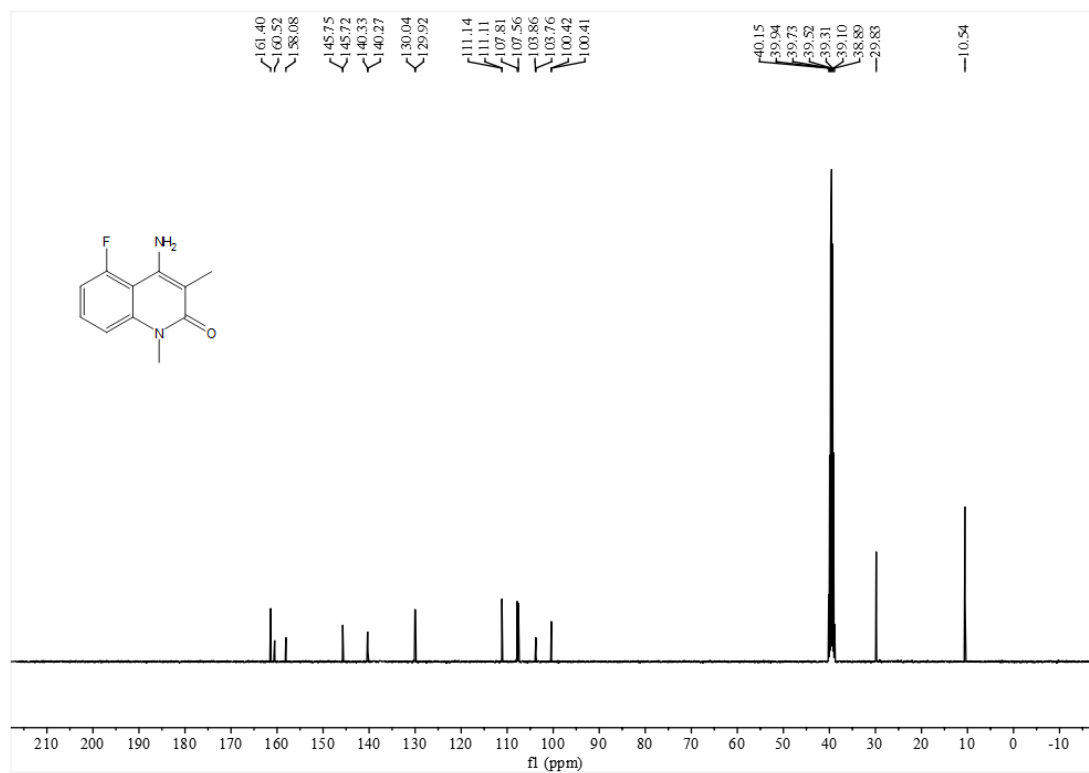

$^{19}\text{F}$  NMR of **3b** (376 MHz,  $\text{DMSO-}d_6$ ):

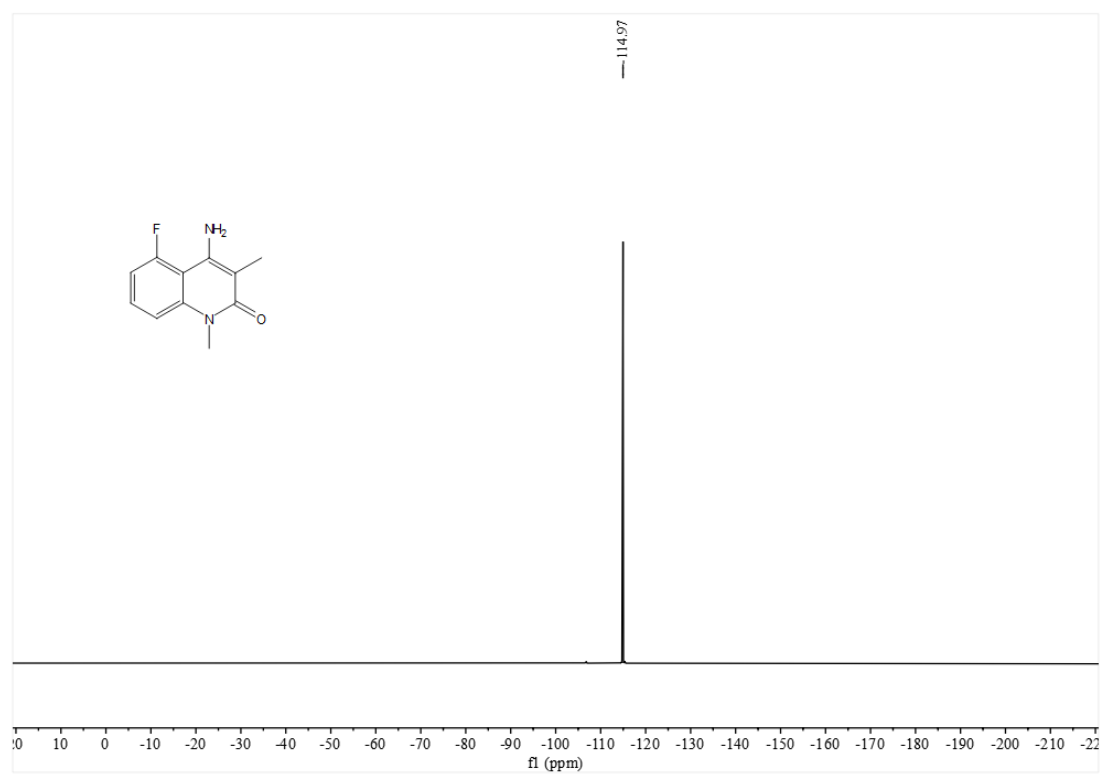

<sup>1</sup>H NMR of **3c** (400 MHz, DMSO-*d*<sub>6</sub>):

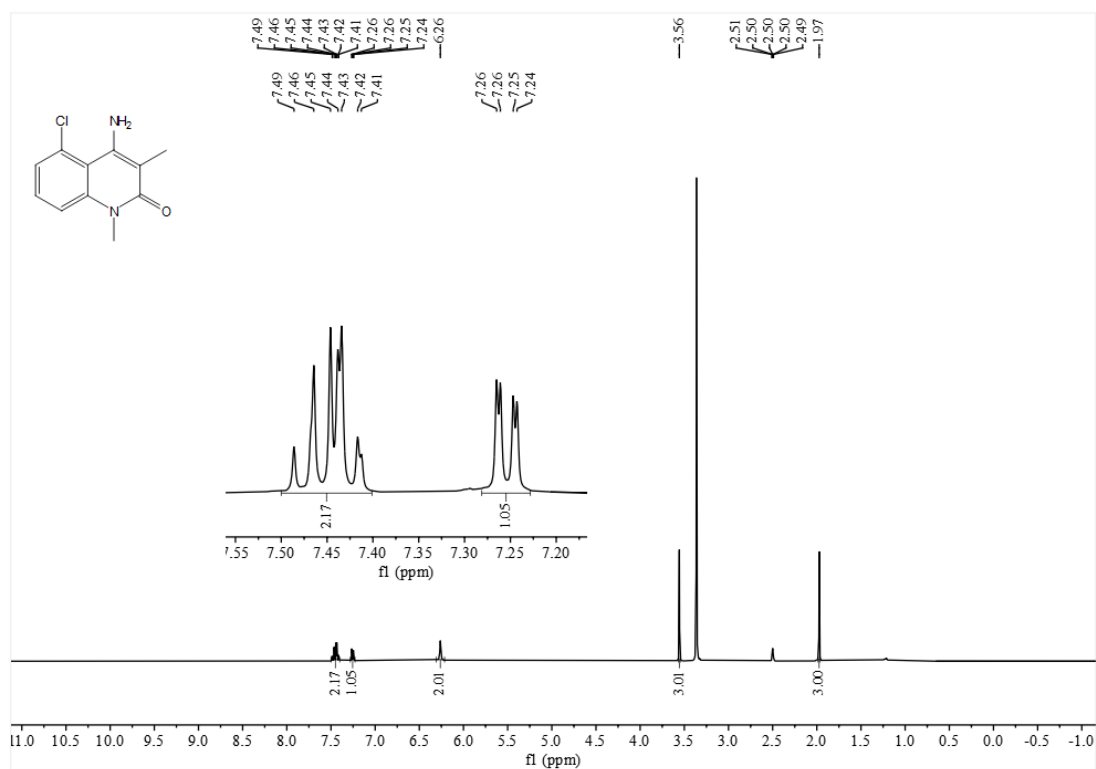

<sup>13</sup>C NMR of **3c** (100 MHz, DMSO-*d*<sub>6</sub>):

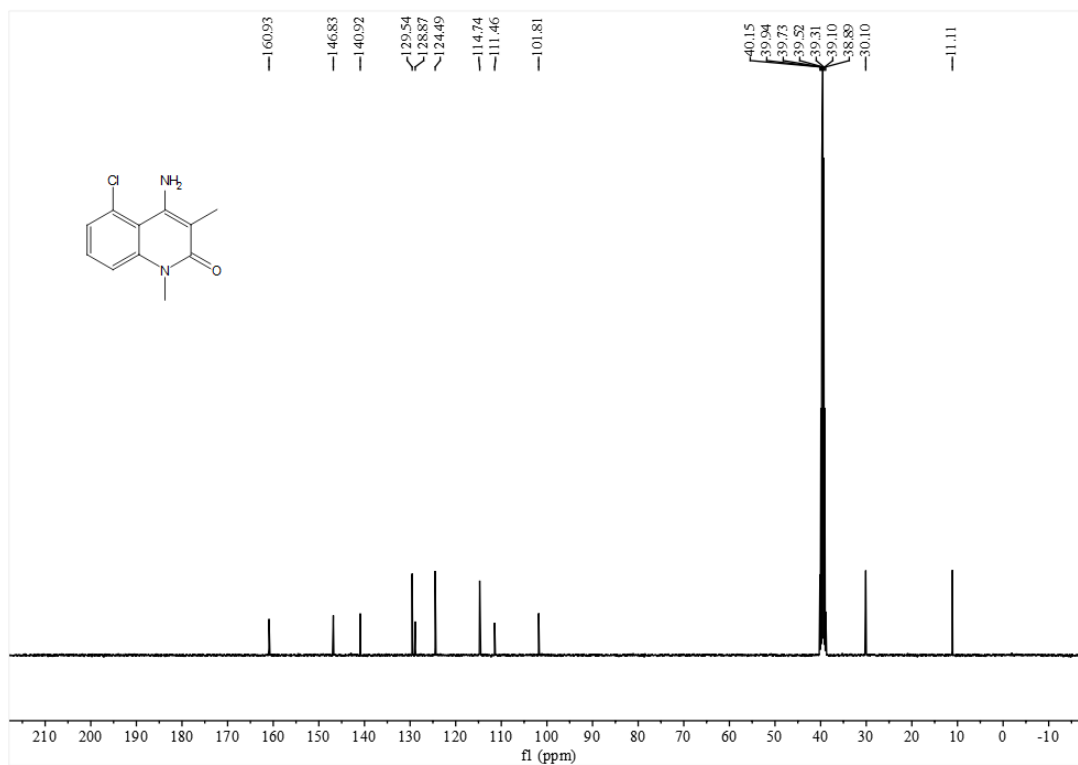

<sup>1</sup>H NMR of **3d** (400 MHz, DMSO-*d*<sub>6</sub>):

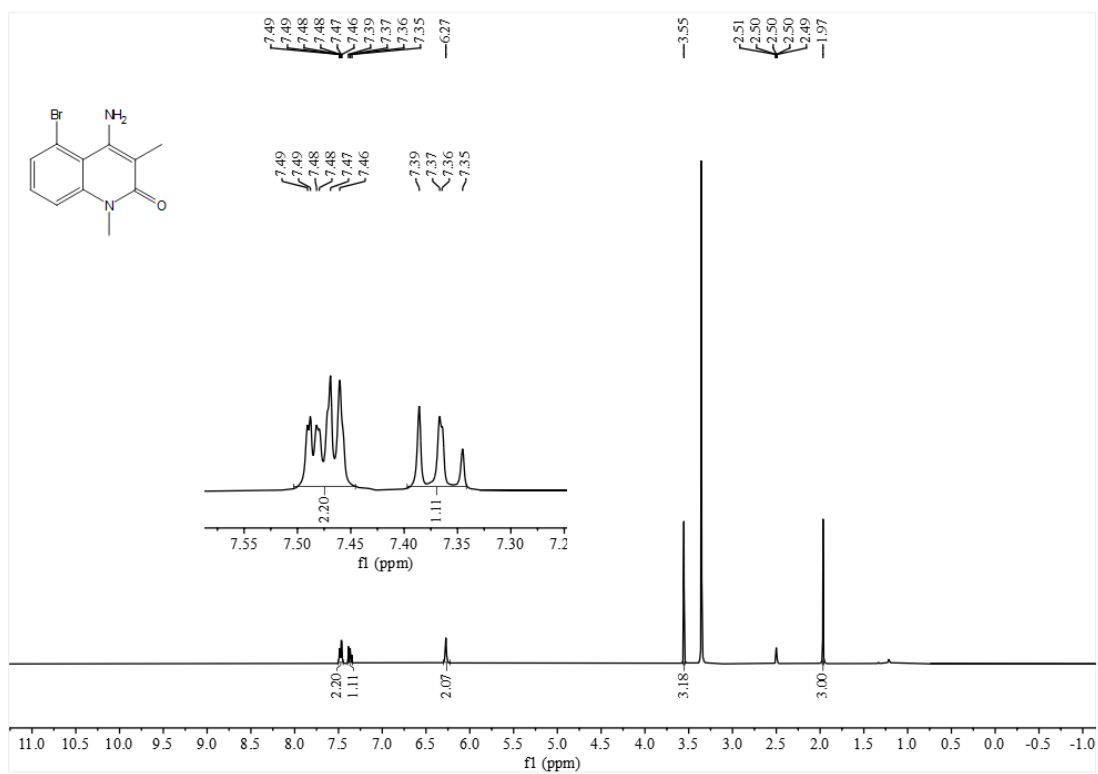

<sup>13</sup>C NMR of **3d** (100 MHz, DMSO-*d*<sub>6</sub>):

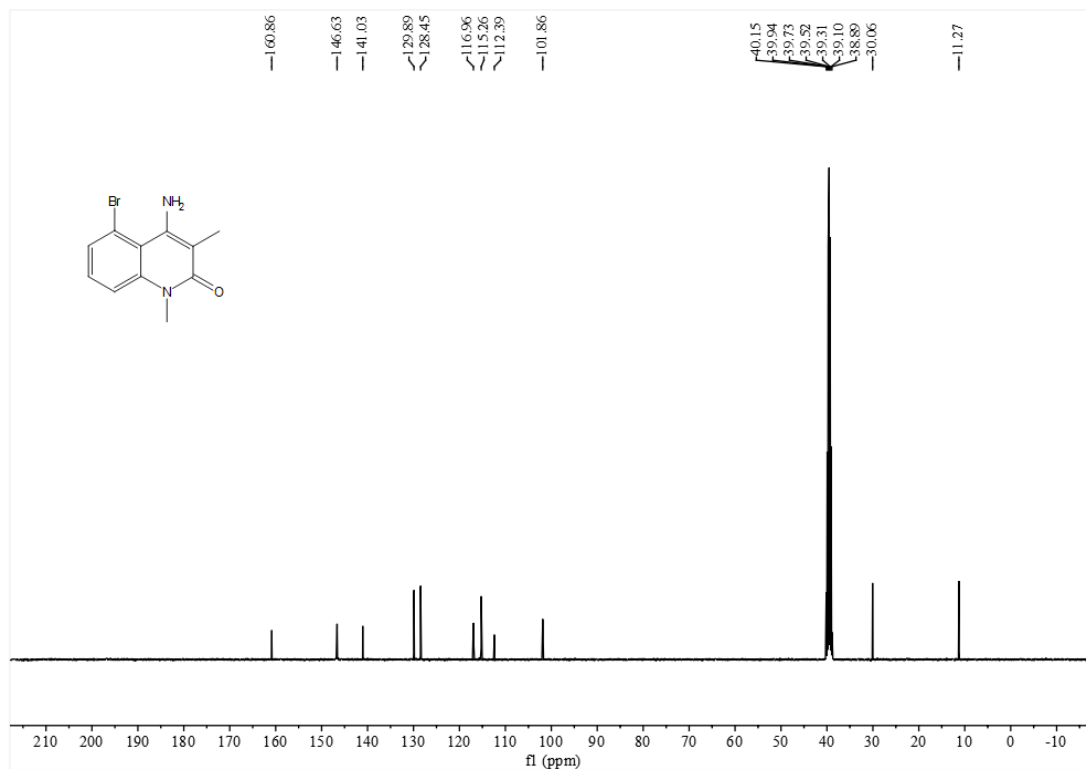

<sup>1</sup>H NMR of **3e** (400 MHz, DMSO-*d*<sub>6</sub>):

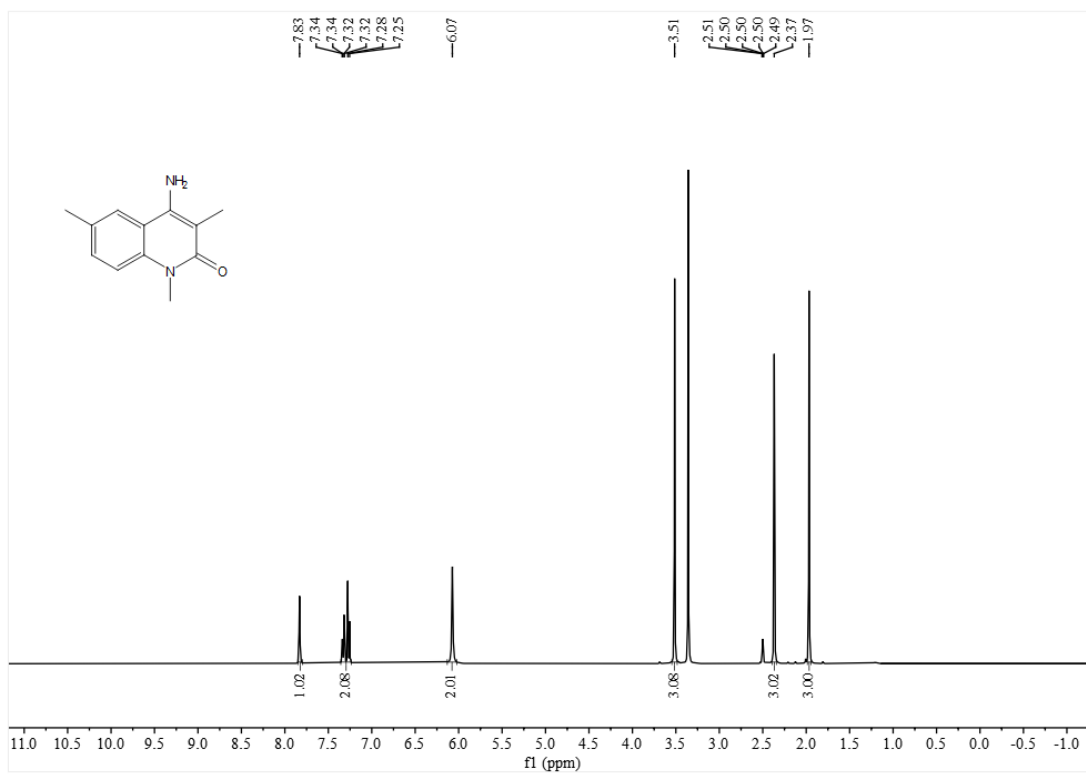

<sup>13</sup>C NMR of **3e** (100 MHz, DMSO-*d*<sub>6</sub>):

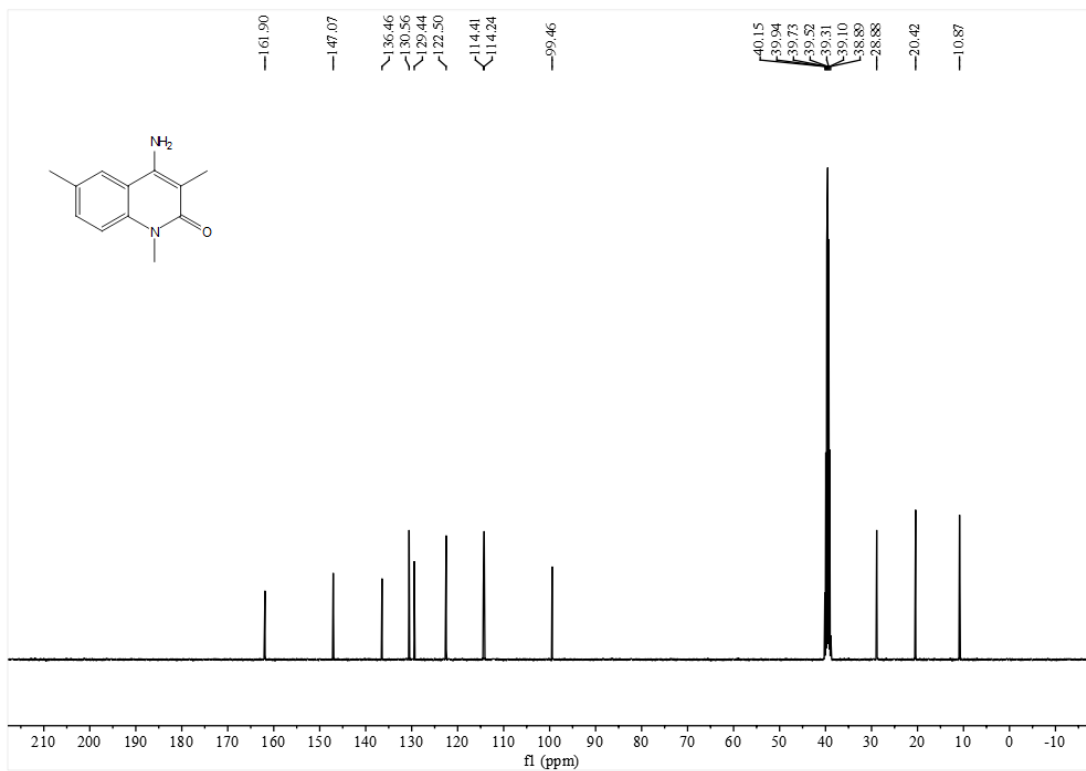

<sup>1</sup>H NMR of **3f** (400 MHz, DMSO-*d*<sub>6</sub>):

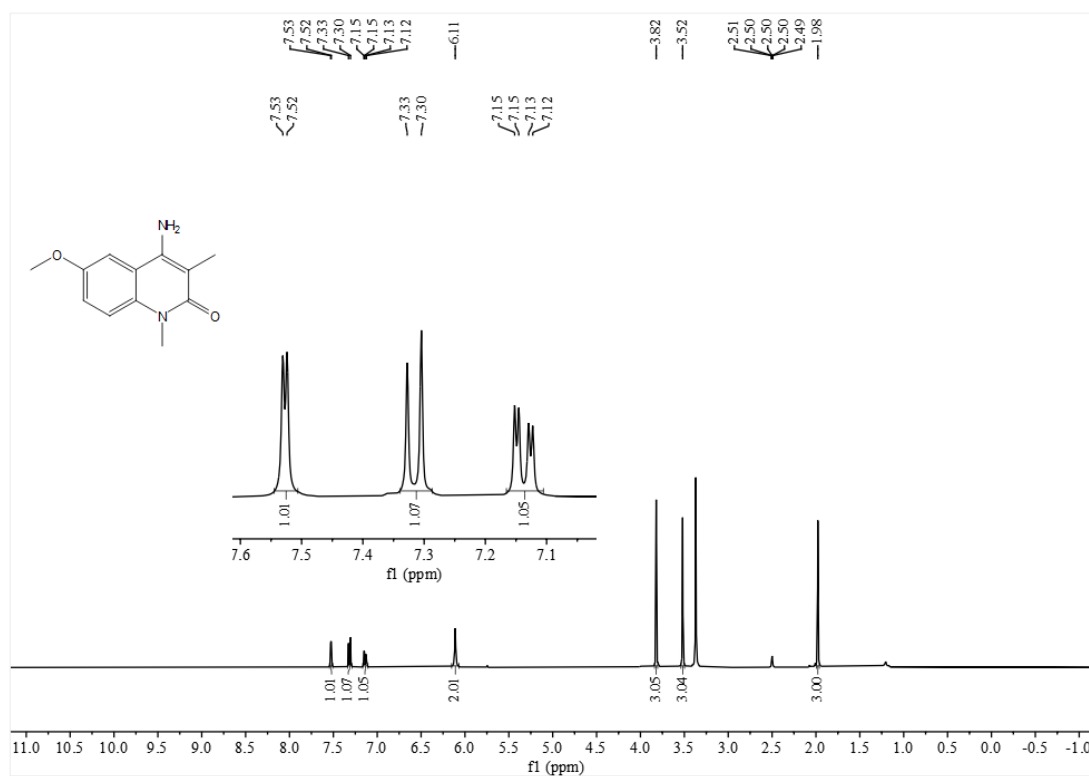

<sup>13</sup>C NMR of **3f** (100 MHz, DMSO-*d*<sub>6</sub>):

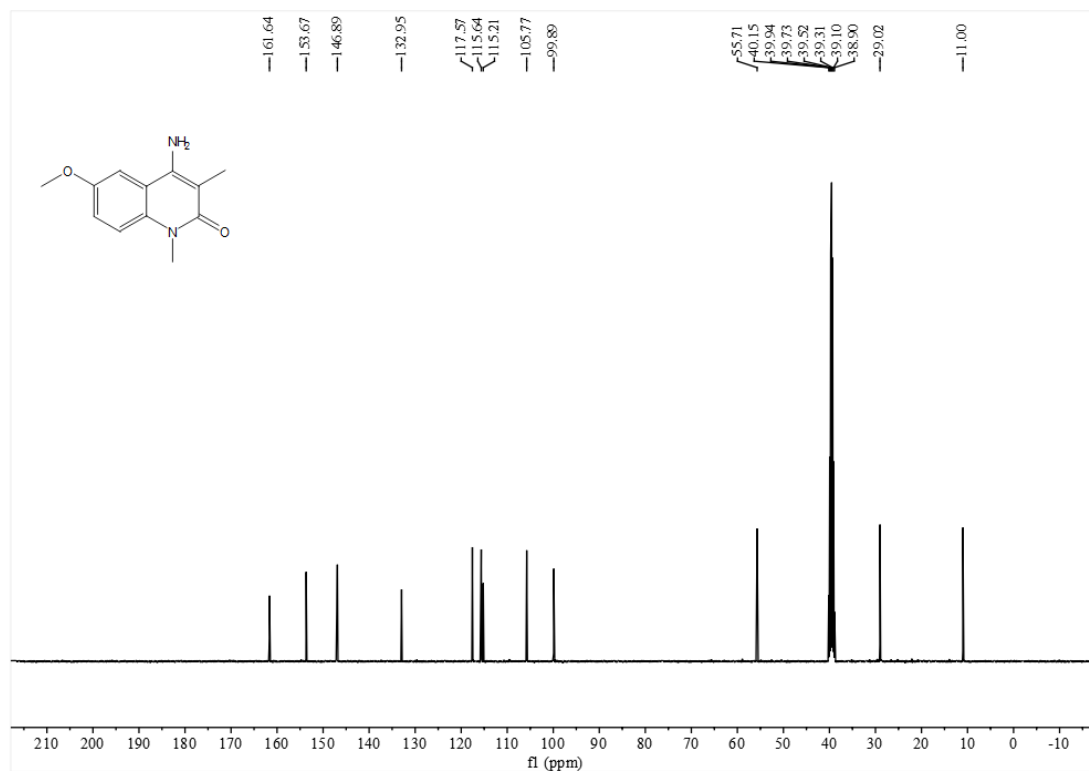

<sup>1</sup>H NMR of **3g** (400 MHz, DMSO-*d*<sub>6</sub>):

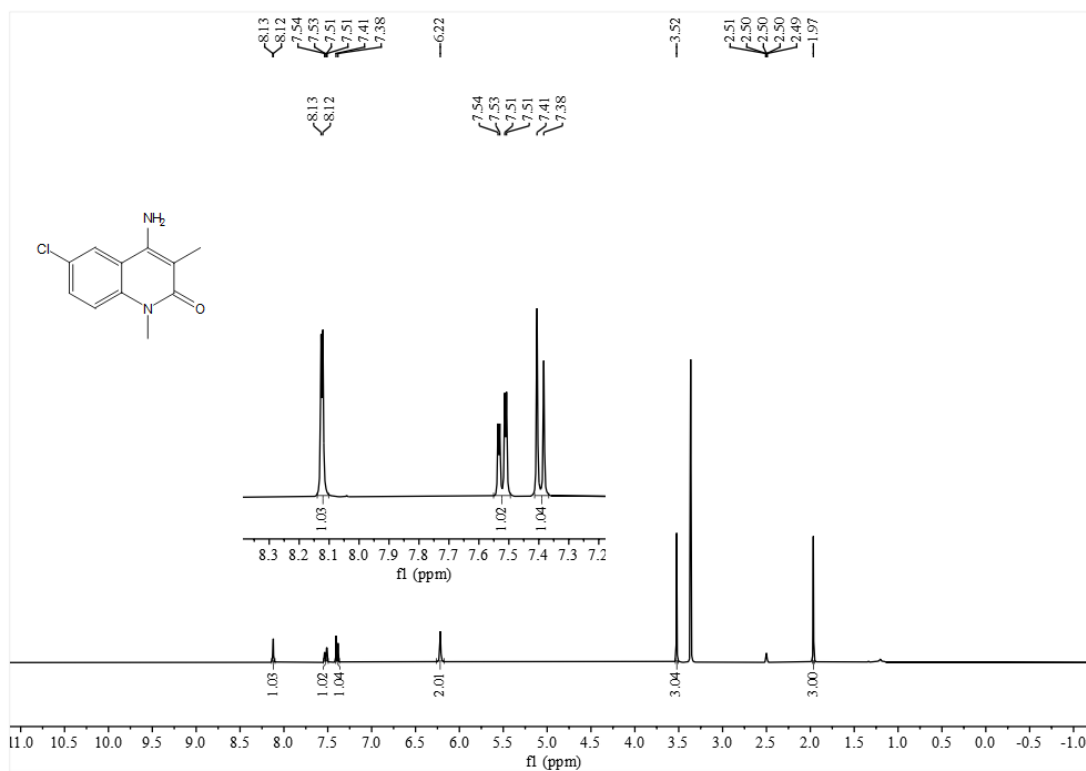

<sup>13</sup>C NMR of **3g** (100 MHz, DMSO-*d*<sub>6</sub>):

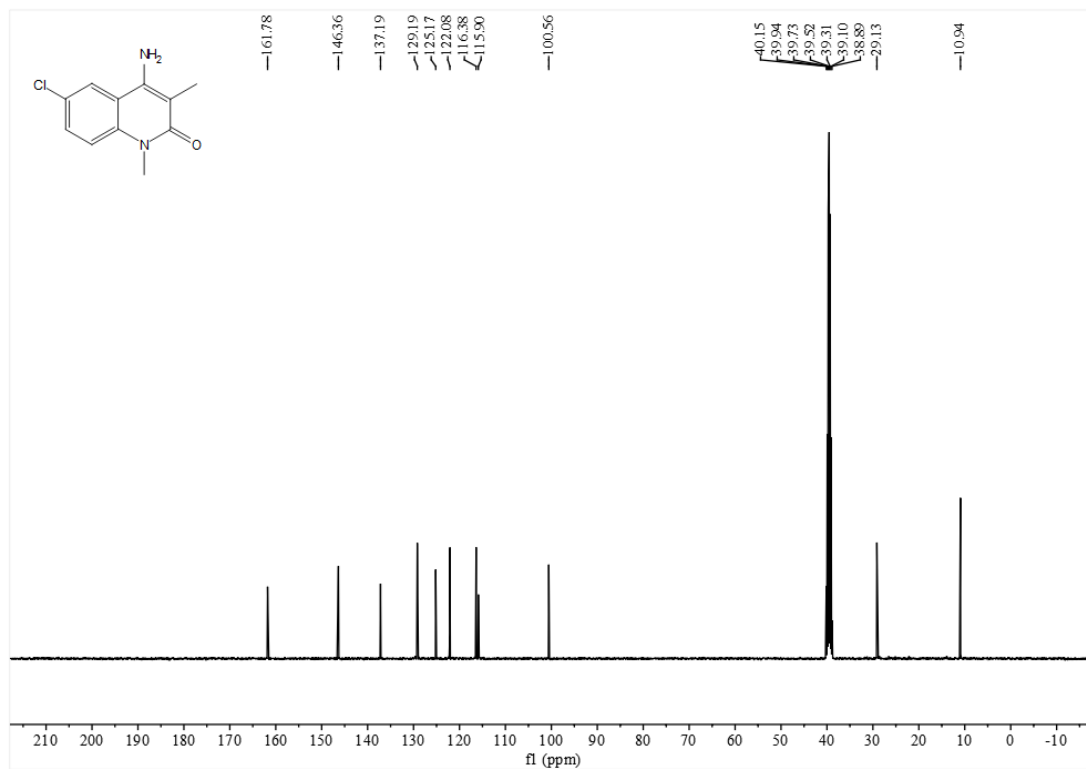

<sup>1</sup>H NMR of **3h** (400 MHz, DMSO-*d*<sub>6</sub>):

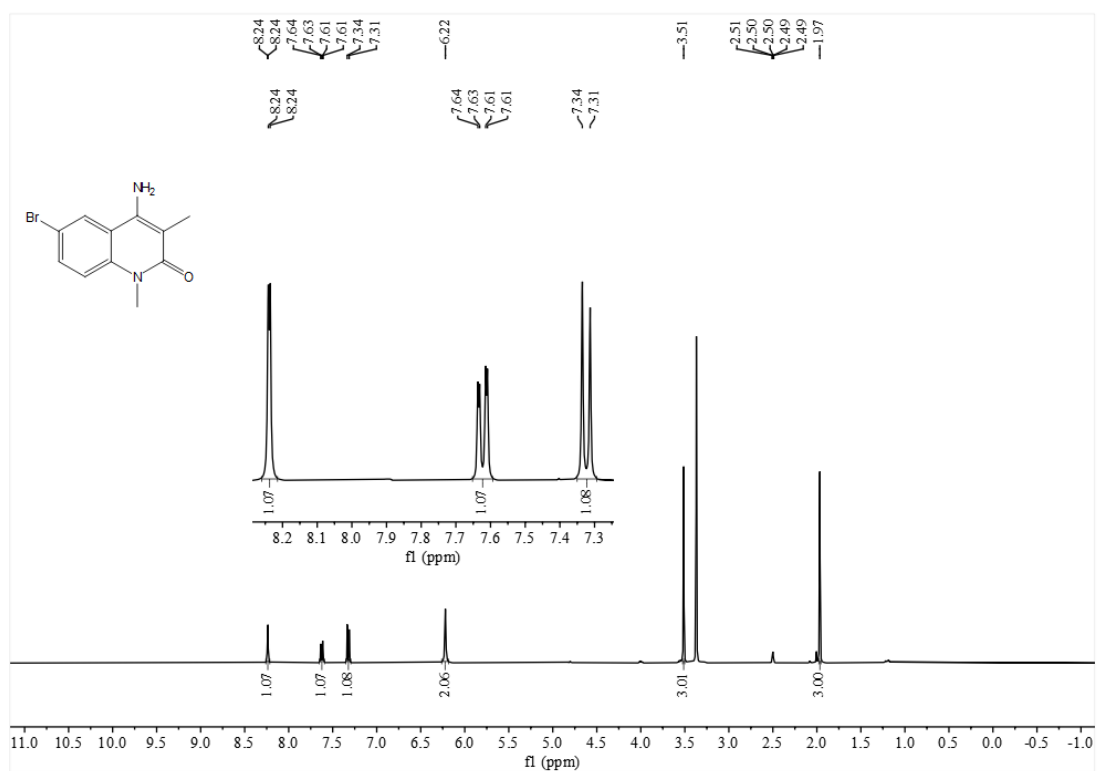

<sup>13</sup>C NMR of **3h** (100 MHz, DMSO-*d*<sub>6</sub>):

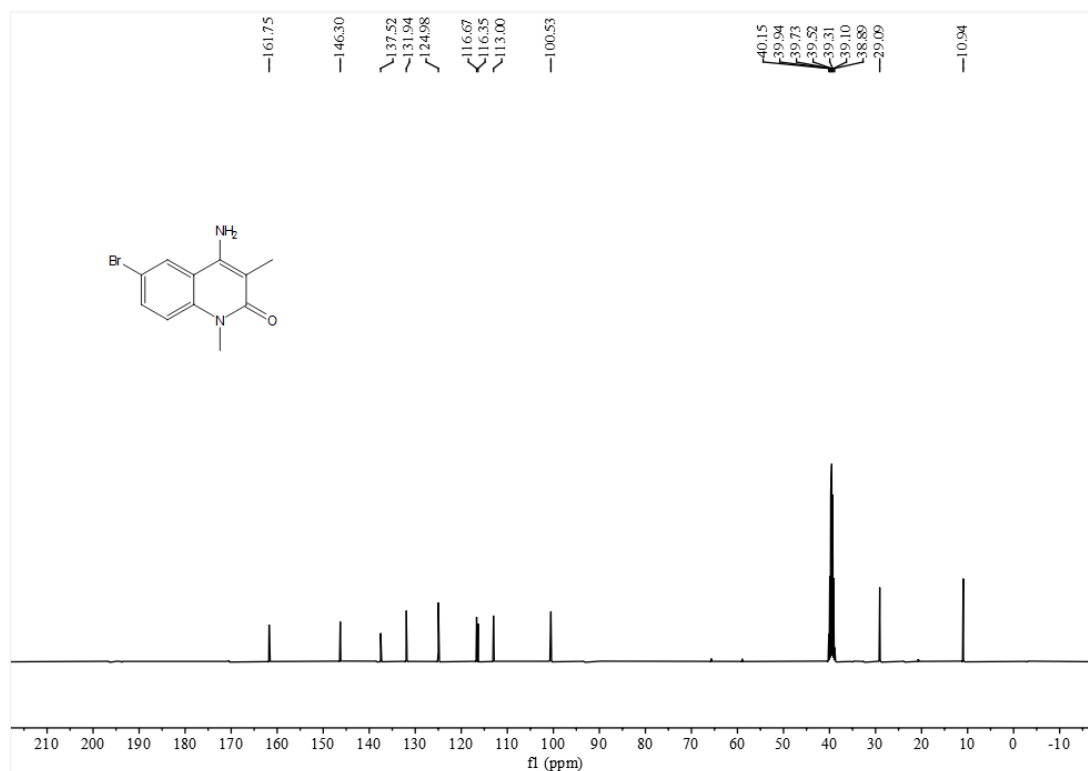



<sup>1</sup>H NMR of **3i** (400 MHz, DMSO-*d*<sub>6</sub>):

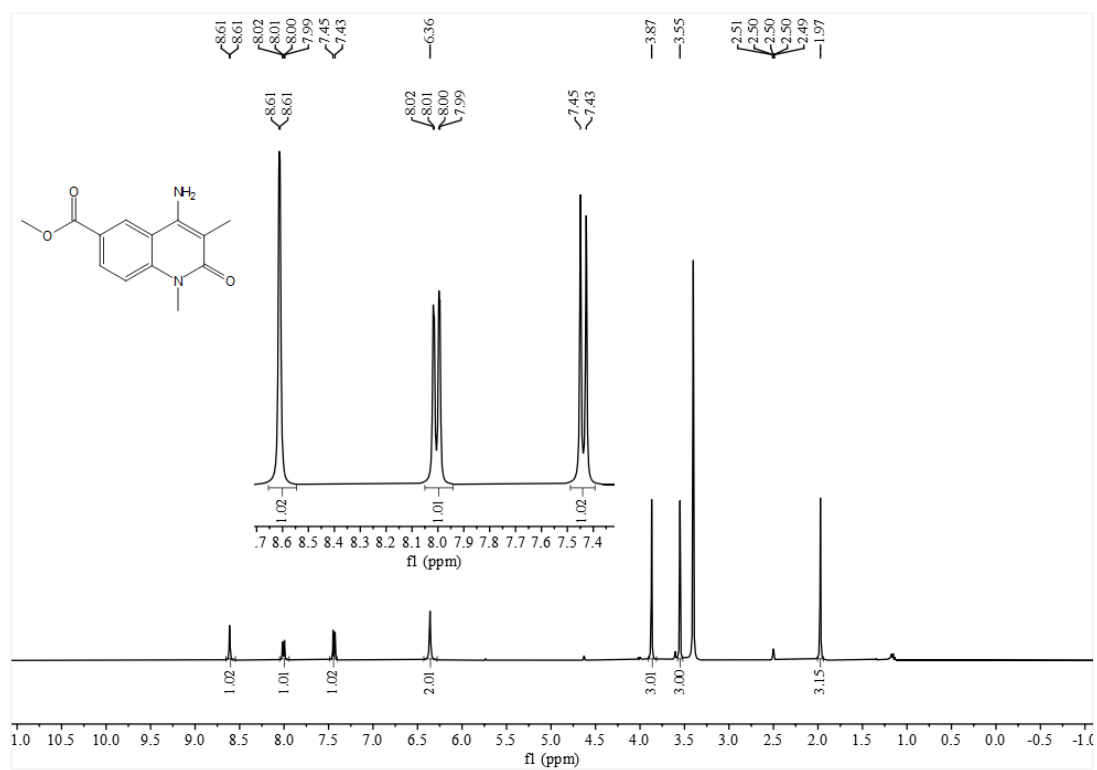

<sup>13</sup>C NMR of **3i** (100 MHz, DMSO-*d*<sub>6</sub>):

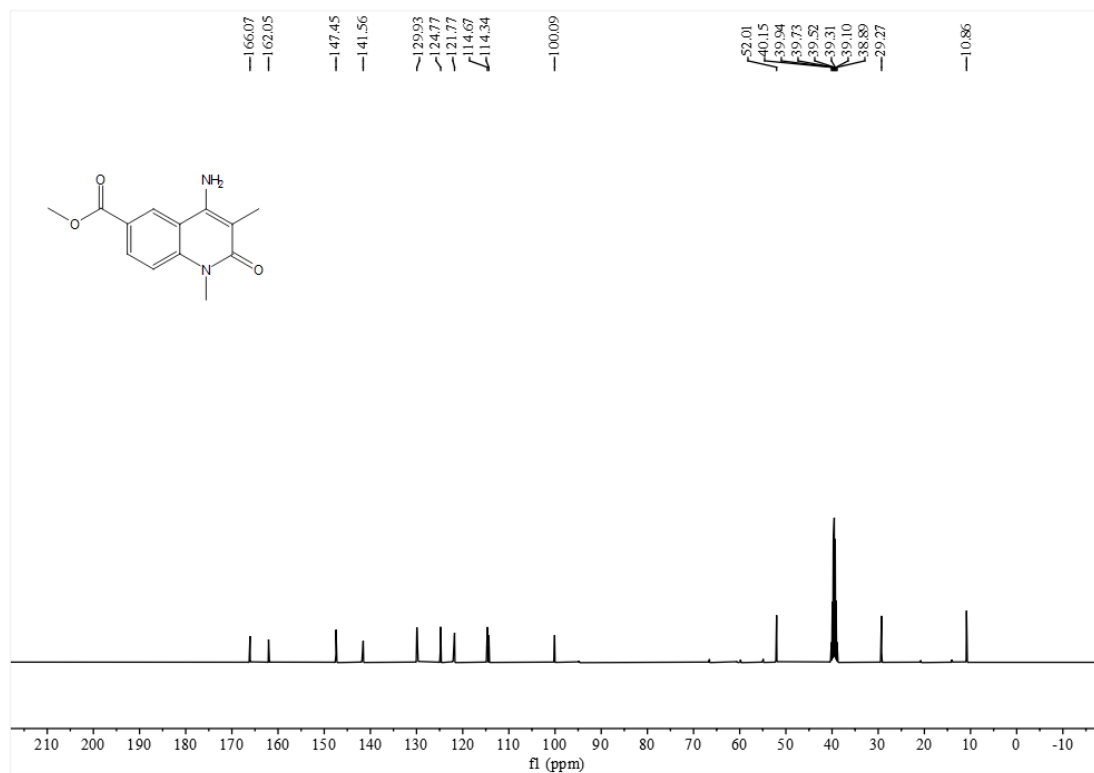

<sup>1</sup>H NMR of **3j** (400 MHz, DMSO-*d*<sub>6</sub>):

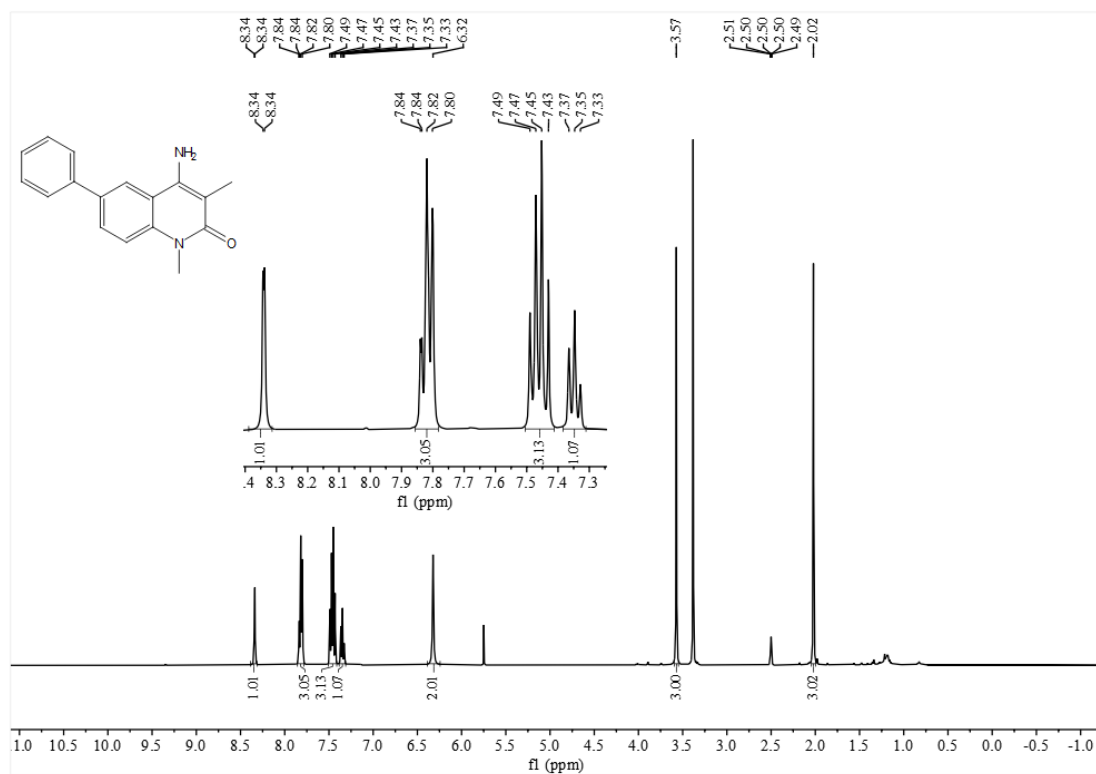

<sup>13</sup>C NMR of **3j** (100 MHz, DMSO-*d*<sub>6</sub>):

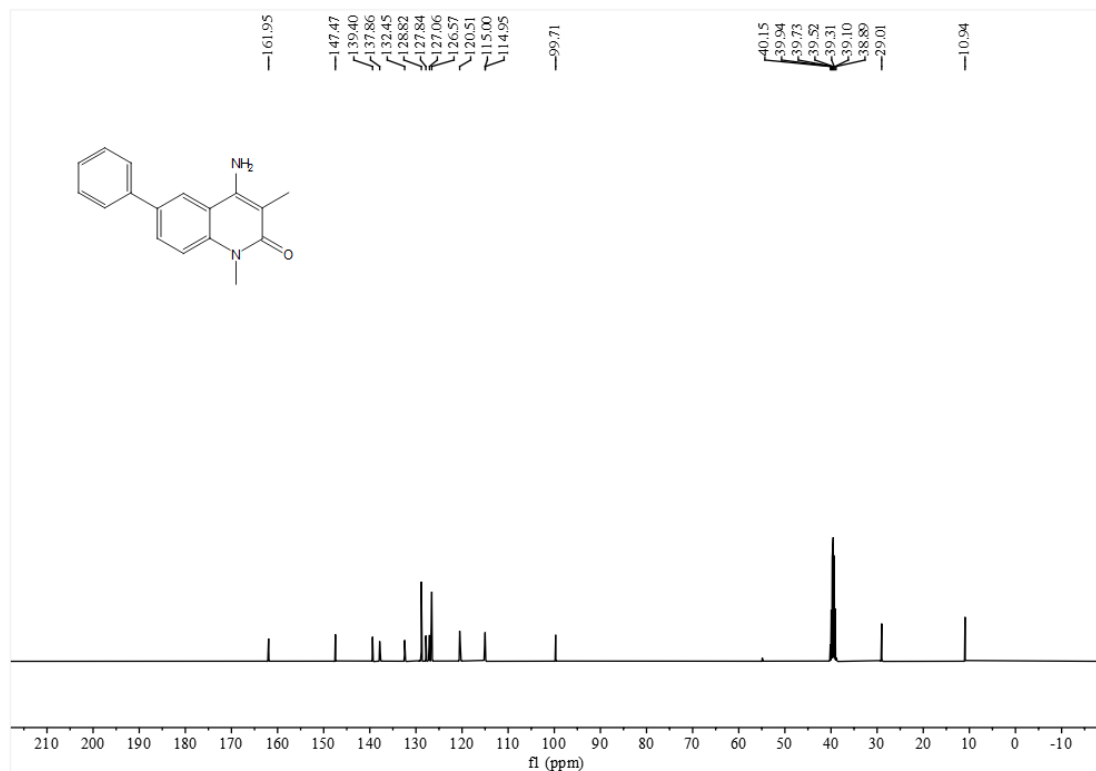

<sup>1</sup>H NMR of **3k** (400 MHz, DMSO-*d*<sub>6</sub>):

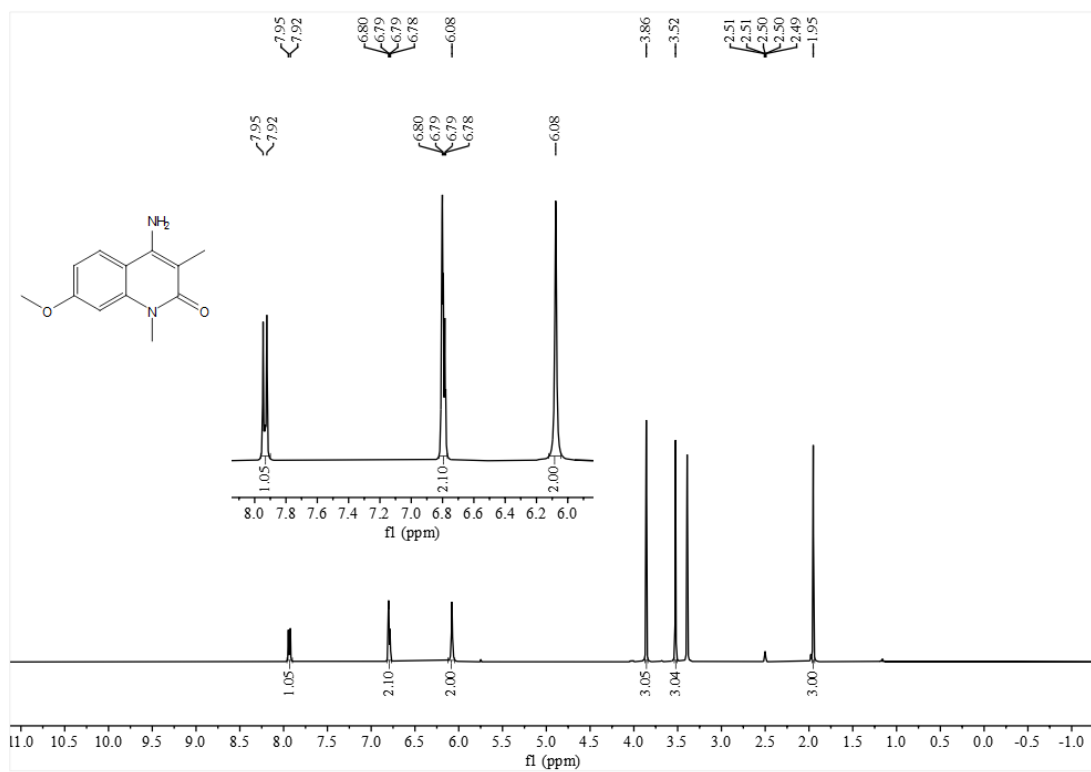

<sup>13</sup>C NMR of **3k** (100 MHz, DMSO-*d*<sub>6</sub>):

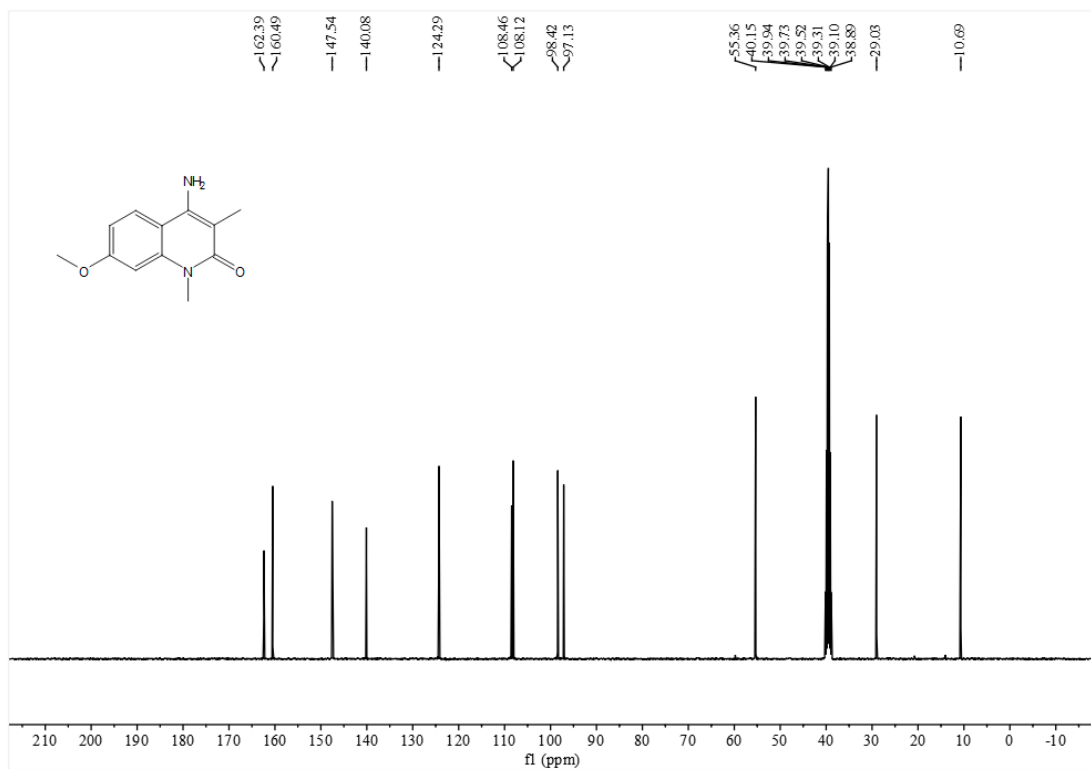

<sup>1</sup>H NMR of **31** (400 MHz, DMSO-*d*<sub>6</sub>):

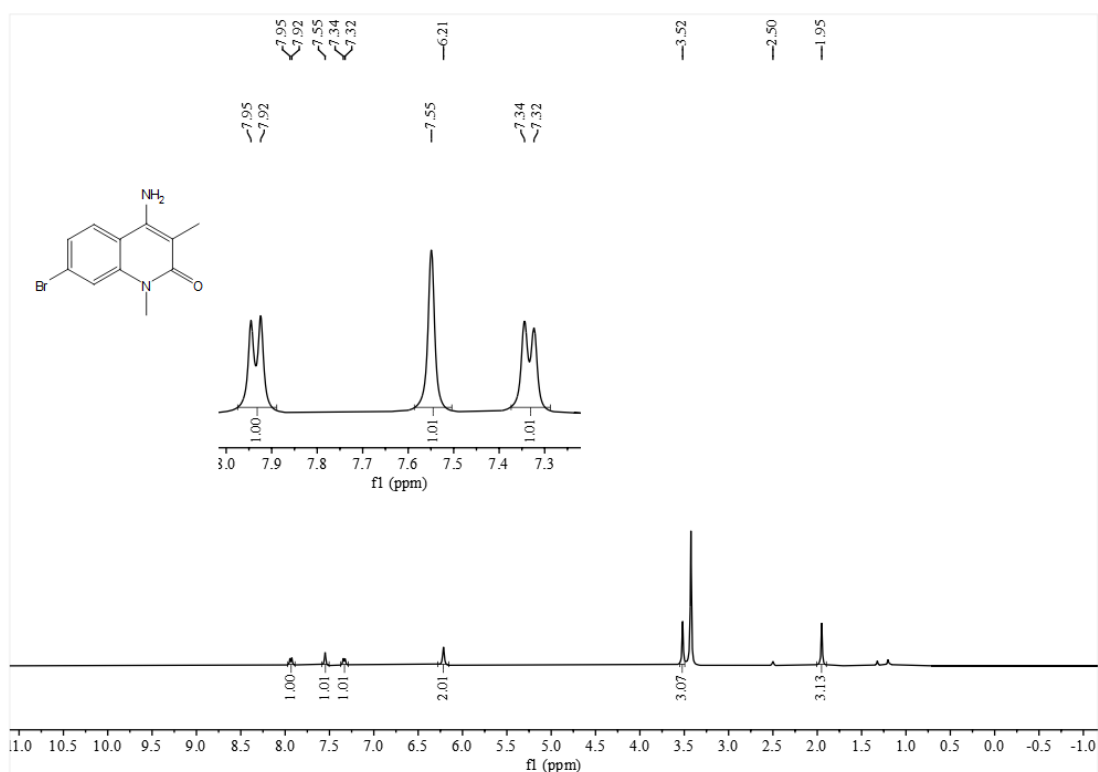

<sup>13</sup>C NMR of **31** (100 MHz, DMSO-*d*<sub>6</sub>):

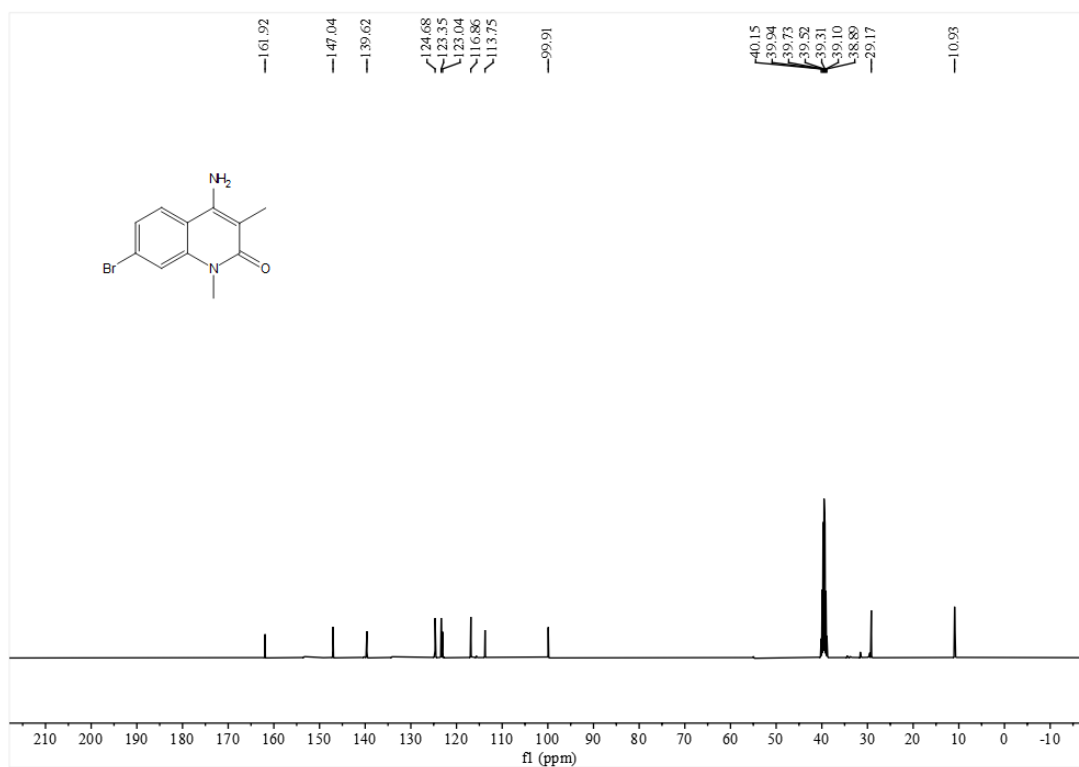

<sup>1</sup>H NMR of **3m** (400 MHz, DMSO-*d*<sub>6</sub>):

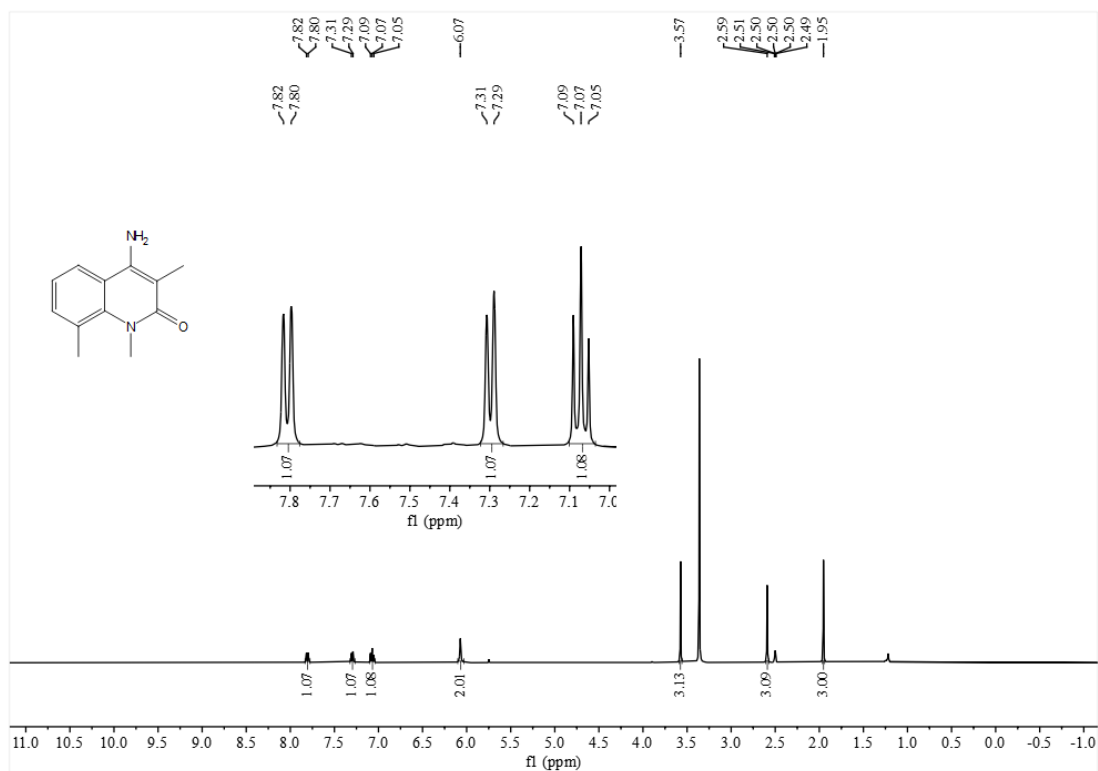

<sup>13</sup>C NMR of **3m** (100 MHz, DMSO-*d*<sub>6</sub>):

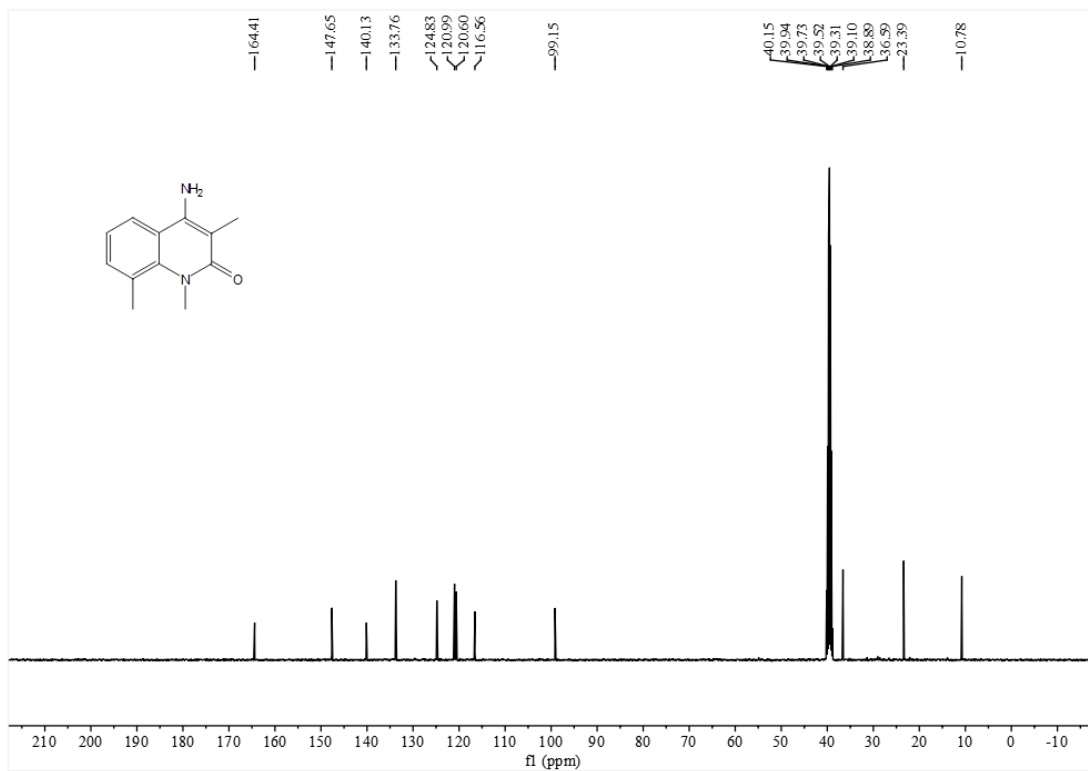

<sup>1</sup>H NMR of **3n** (400 MHz, DMSO-*d*<sub>6</sub>):

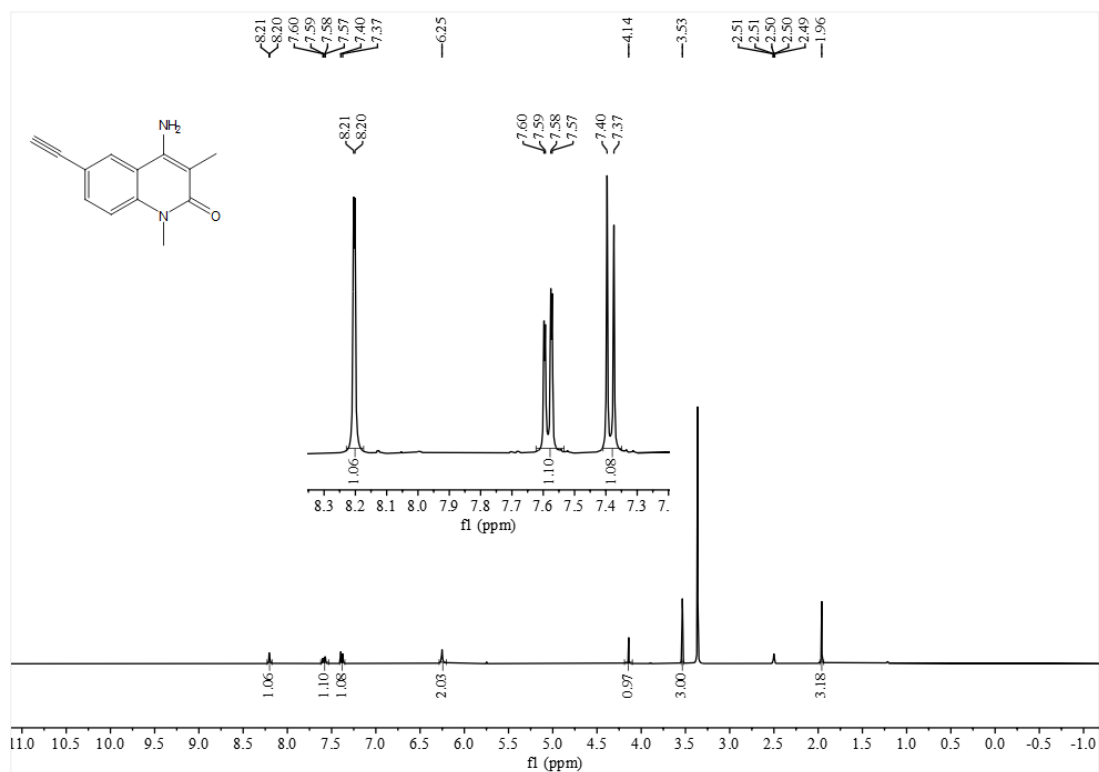

<sup>13</sup>C NMR of **3n** (100 MHz, DMSO-*d*<sub>6</sub>):

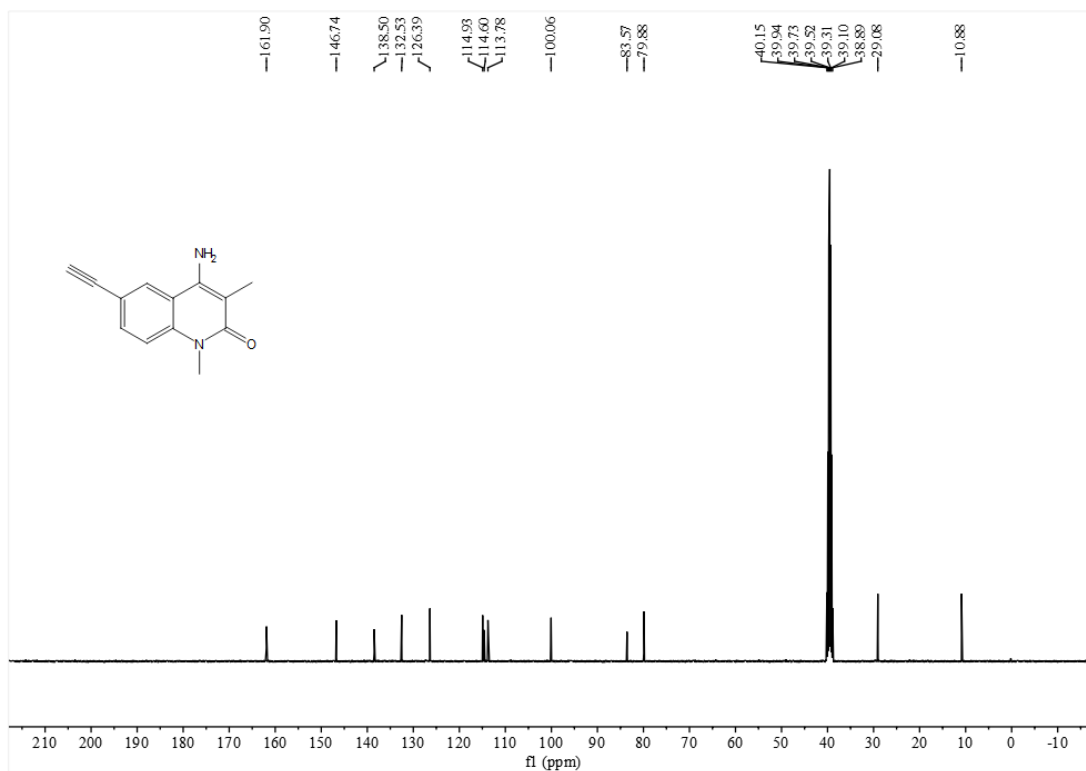

<sup>1</sup>H NMR of **3o** (400 MHz, DMSO-*d*<sub>6</sub>):

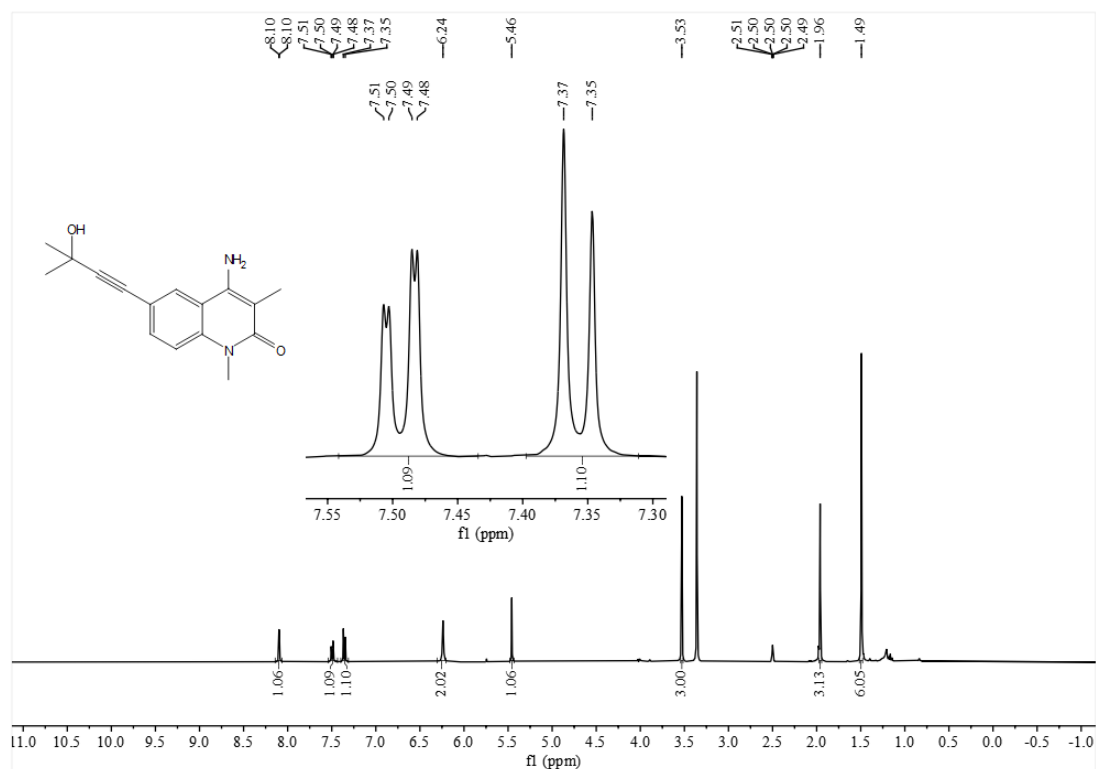

<sup>13</sup>C NMR of **3o** (100 MHz, DMSO-*d*<sub>6</sub>):

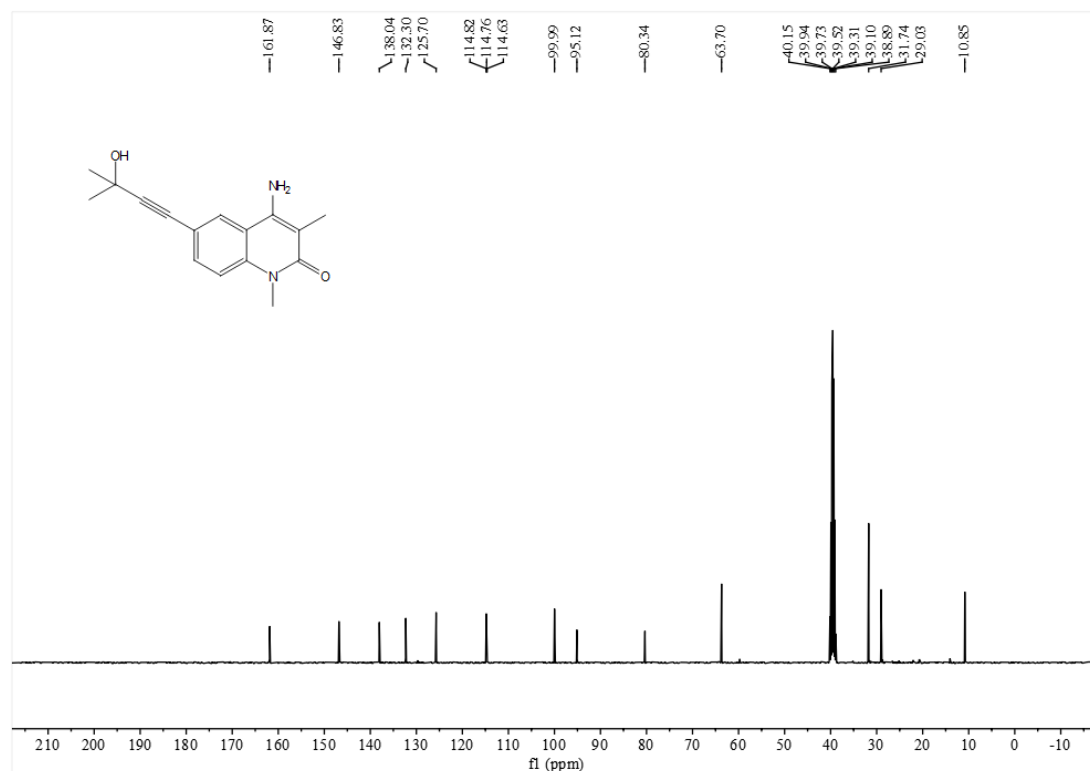

<sup>1</sup>H NMR of **3p** (400 MHz, DMSO-*d*<sub>6</sub>):

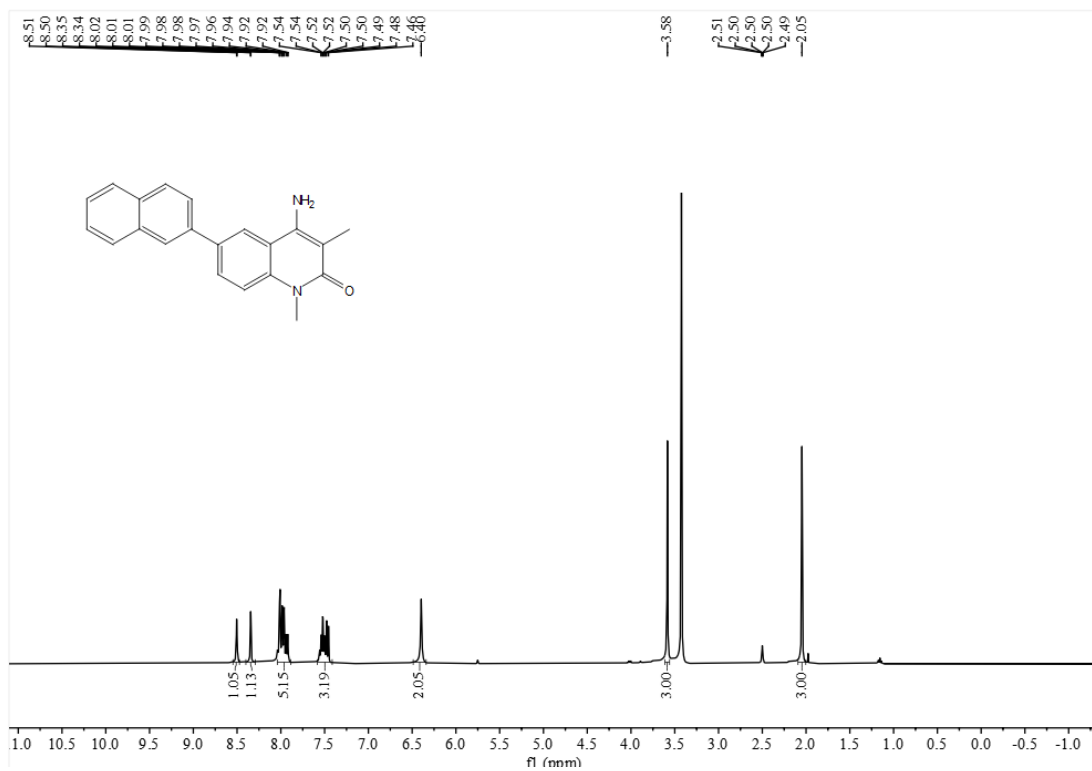

<sup>13</sup>C NMR of **3p** (100 MHz, DMSO-*d*<sub>6</sub>):

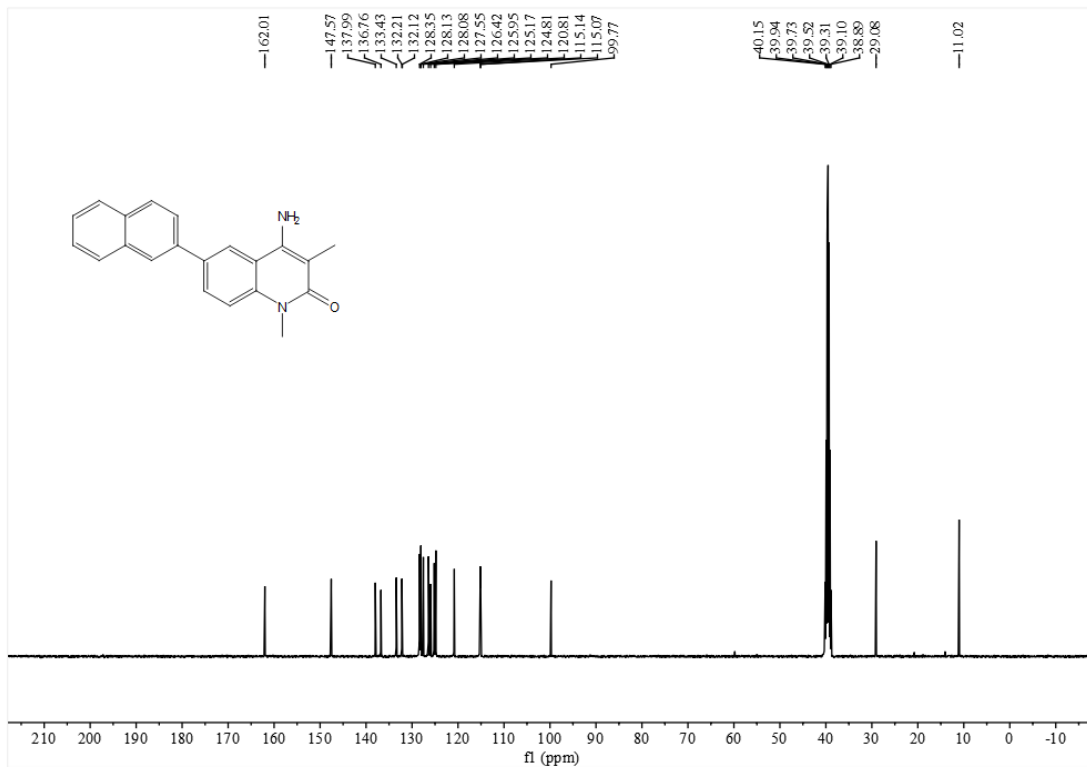



<sup>1</sup>H NMR of **3q** (400 MHz, DMSO-*d*<sub>6</sub>):

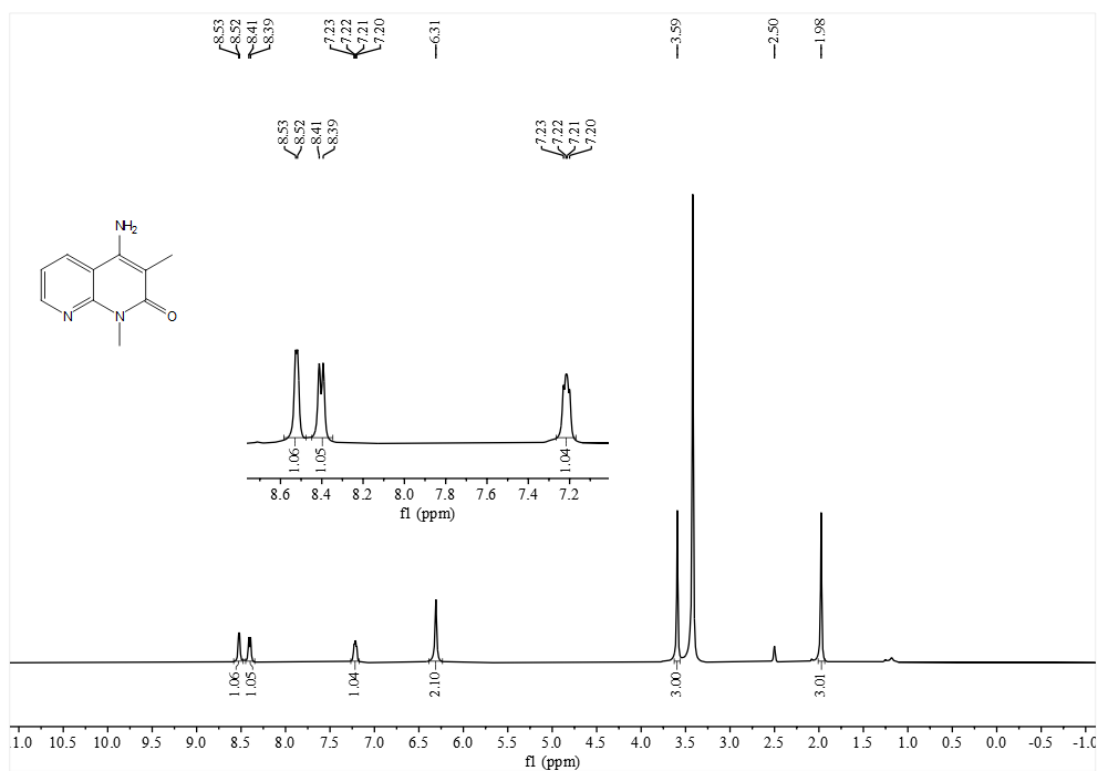

<sup>13</sup>C NMR of **3q** (100 MHz, DMSO-*d*<sub>6</sub>):

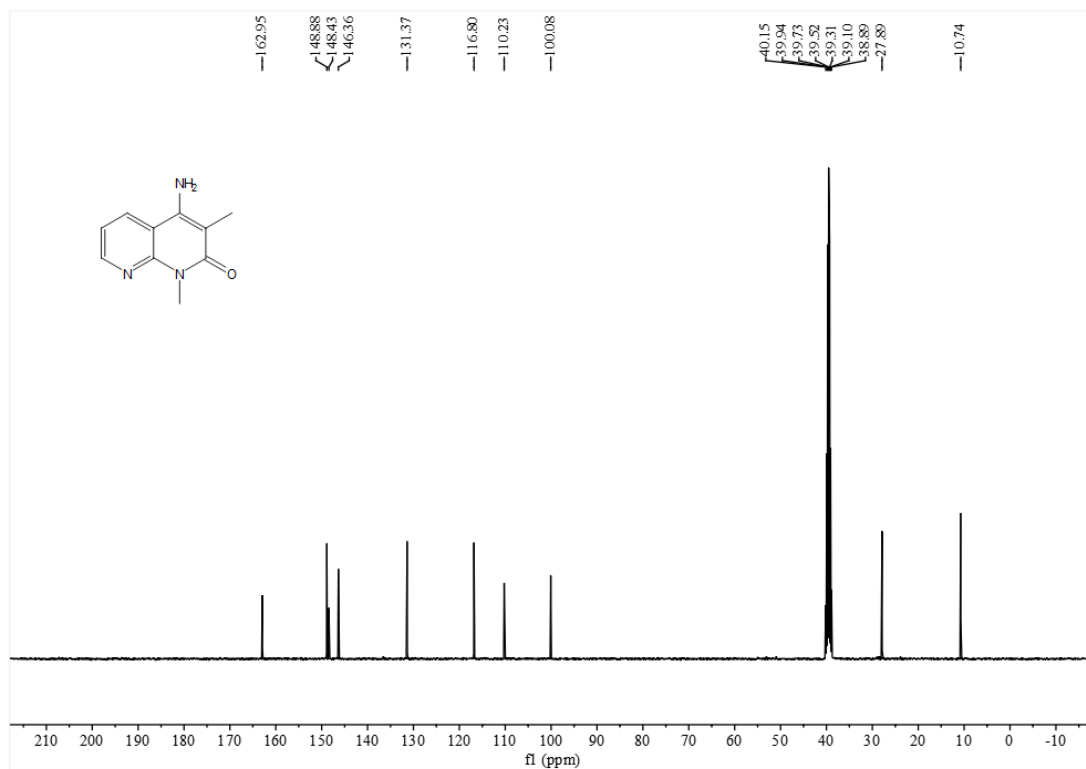

<sup>1</sup>H NMR of **3r** (400 MHz, DMSO-*d*<sub>6</sub>):

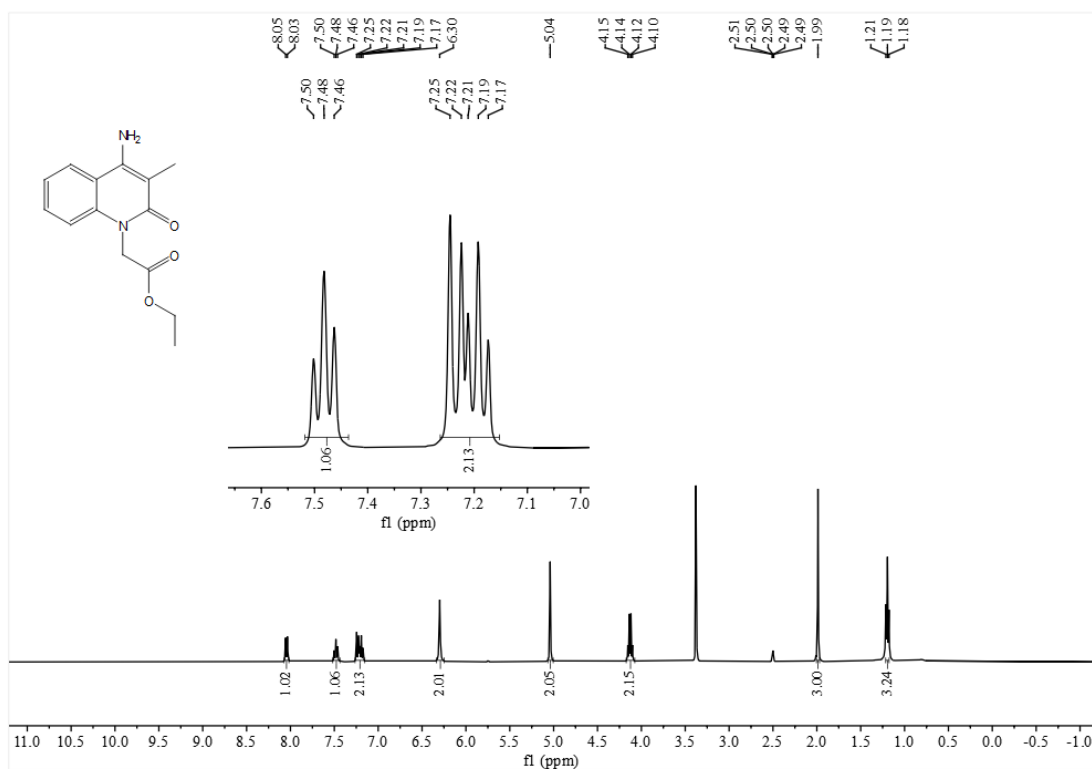

<sup>13</sup>C NMR of **3r** (100 MHz, DMSO-*d*<sub>6</sub>):

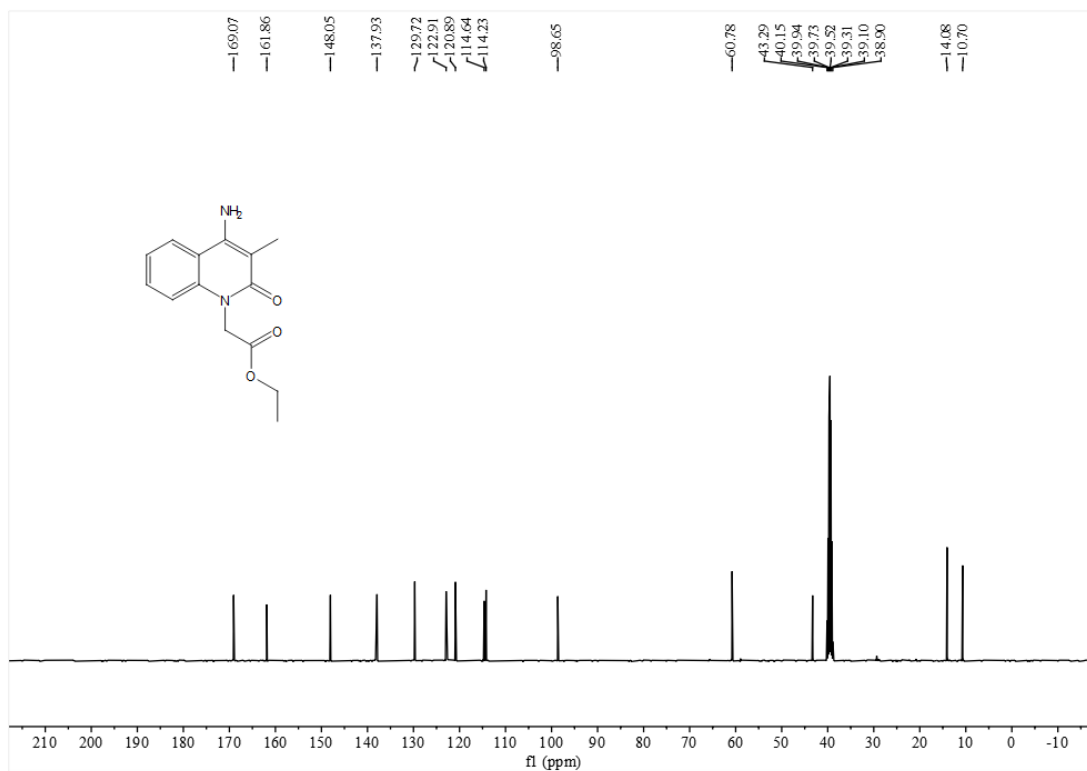

<sup>1</sup>H NMR of **3s** (400 MHz, DMSO-*d*<sub>6</sub>):

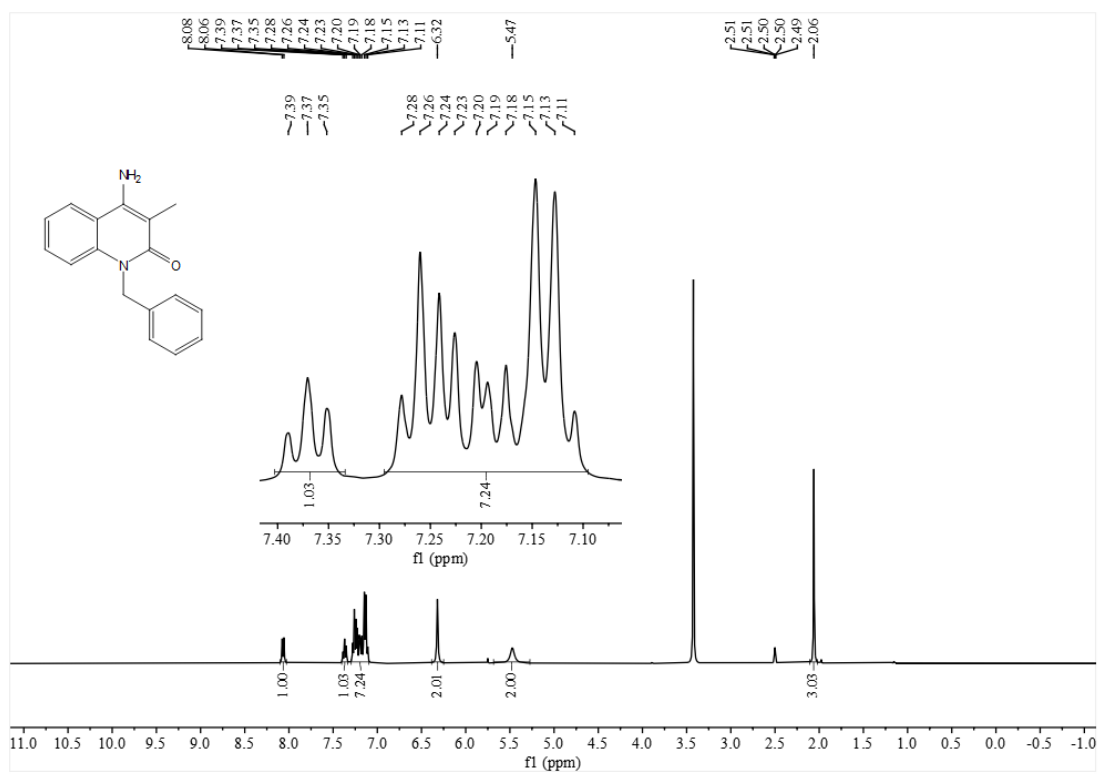

<sup>13</sup>C NMR of **3s** (100 MHz, DMSO-*d*<sub>6</sub>):

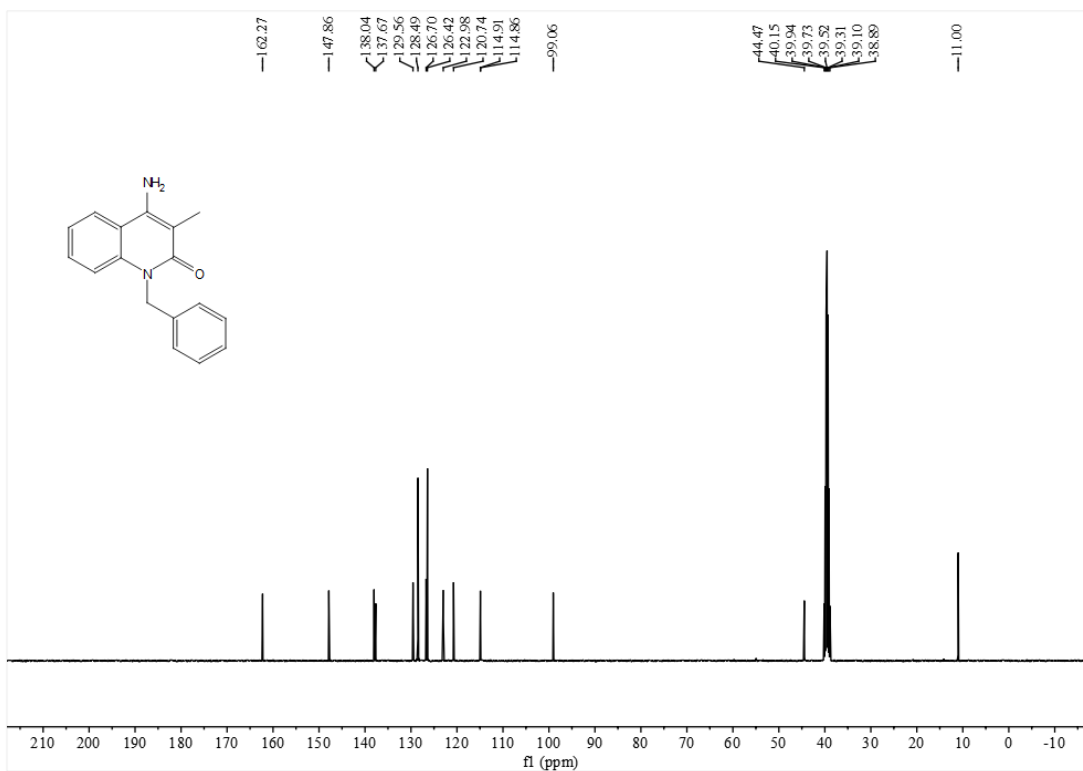

<sup>1</sup>H NMR of **3x** (400 MHz, DMSO-*d*<sub>6</sub>):

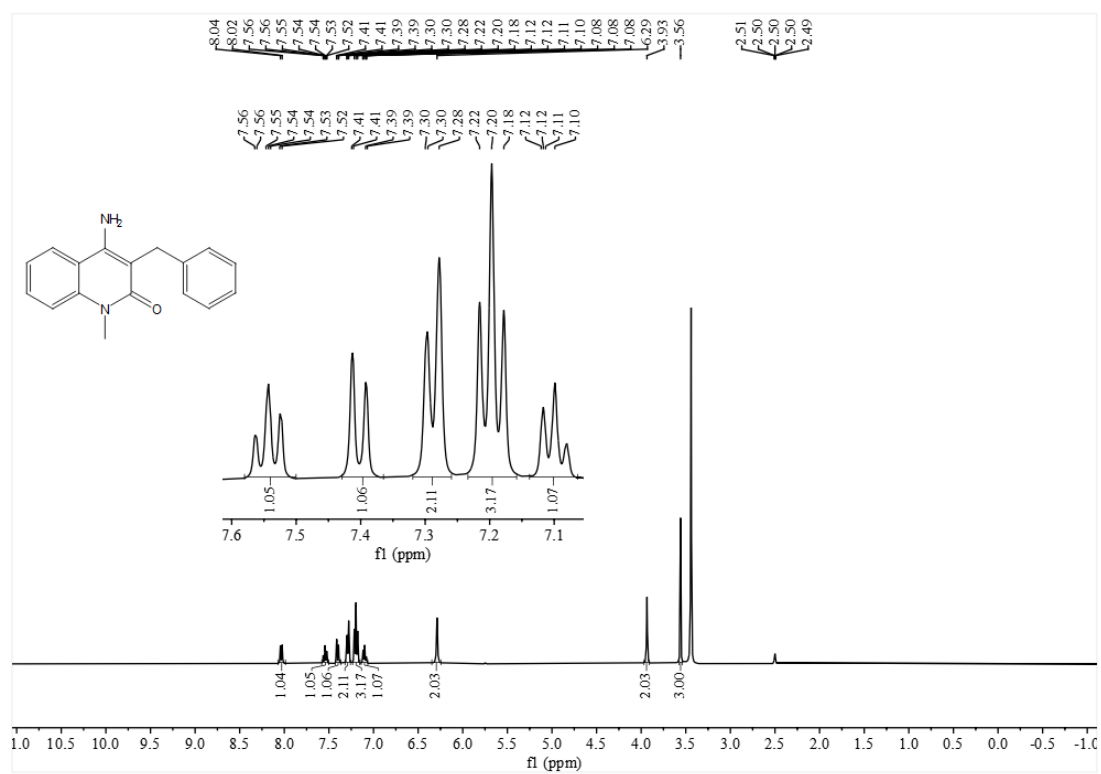

<sup>13</sup>C NMR of **3x** (100 MHz, DMSO-*d*<sub>6</sub>):

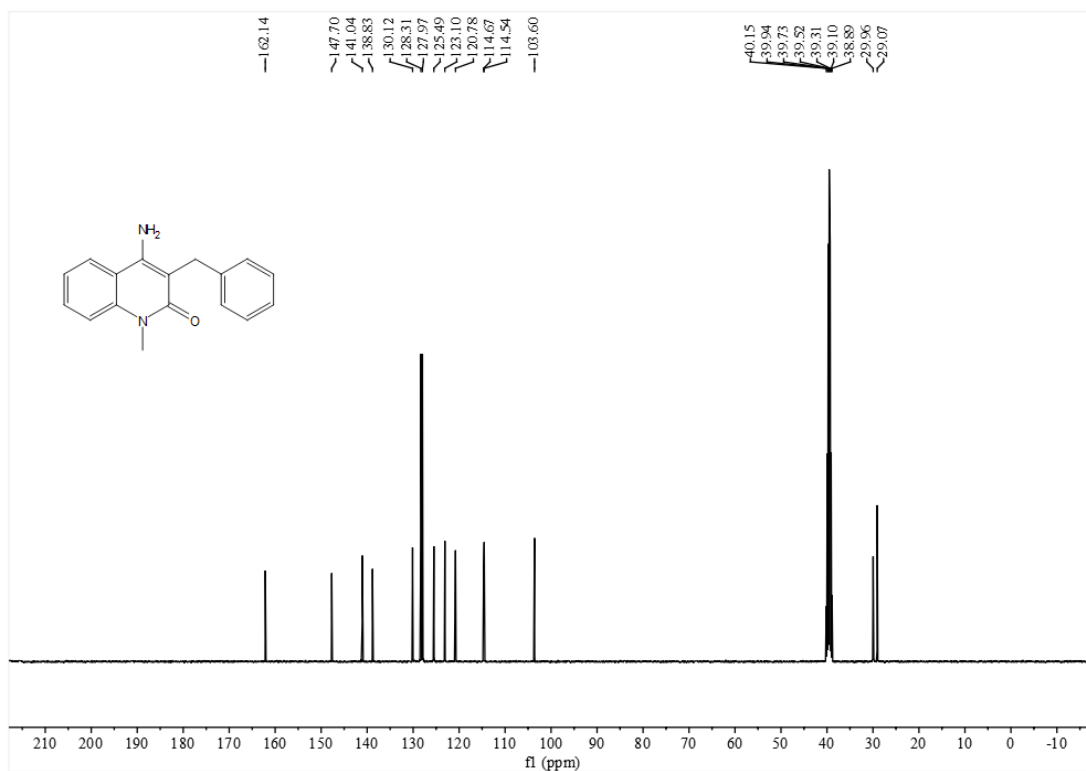

<sup>1</sup>H NMR of **3y** (400 MHz, DMSO-*d*<sub>6</sub>):

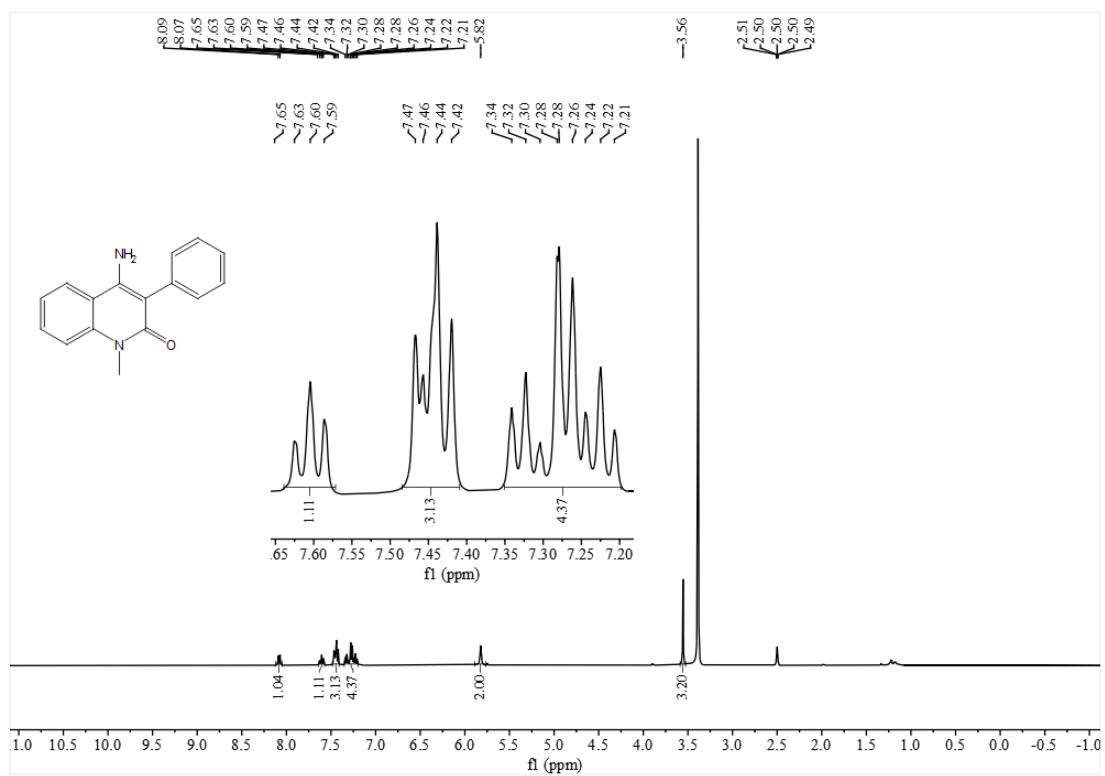

<sup>13</sup>C NMR of **3y** (100 MHz, DMSO-*d*<sub>6</sub>):

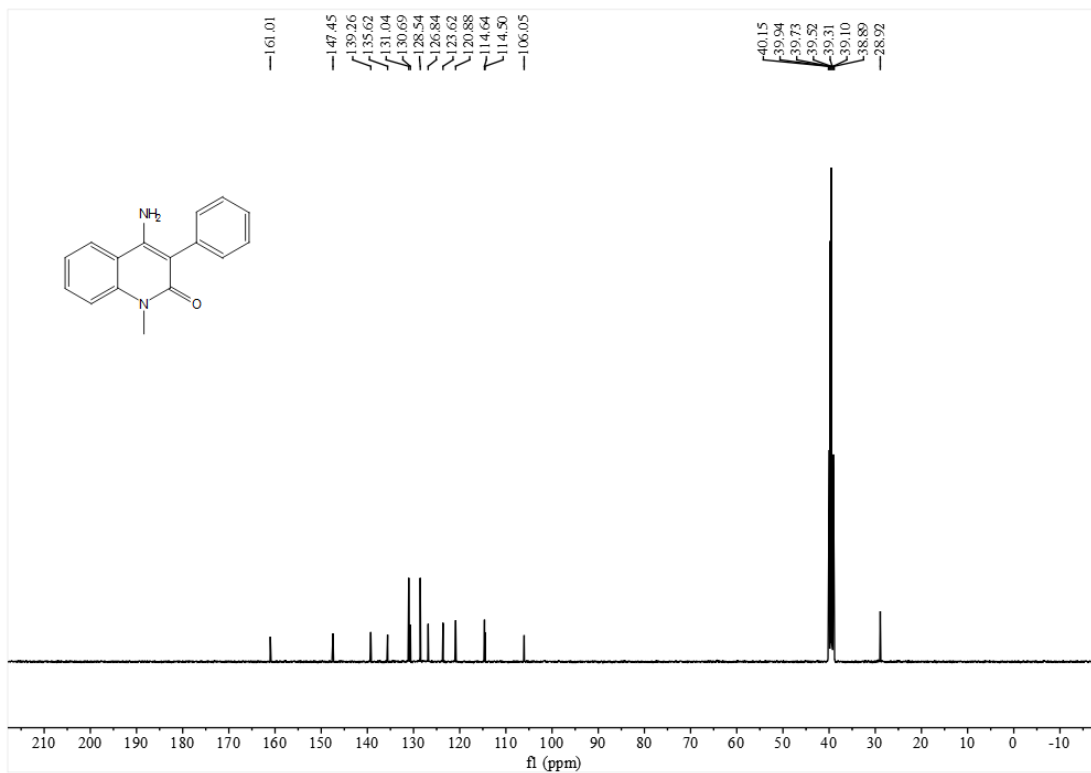

Supplement: d4qo00458b1.pdf [file d4qo00458b1.pdf]
